# Supplementary material for: Novel Method of Synthesis of 5''-Phosphate 2'-O-ribosyl-ribonucleosides and Their 3'-Phosphoramidites
Source: MDPI journal article supplement (doi:10.3390/molecules181214780), 2013-11-29

# Supplementary Materials

Figure S1. <sup>1</sup>H-NMR of Compound 7a.

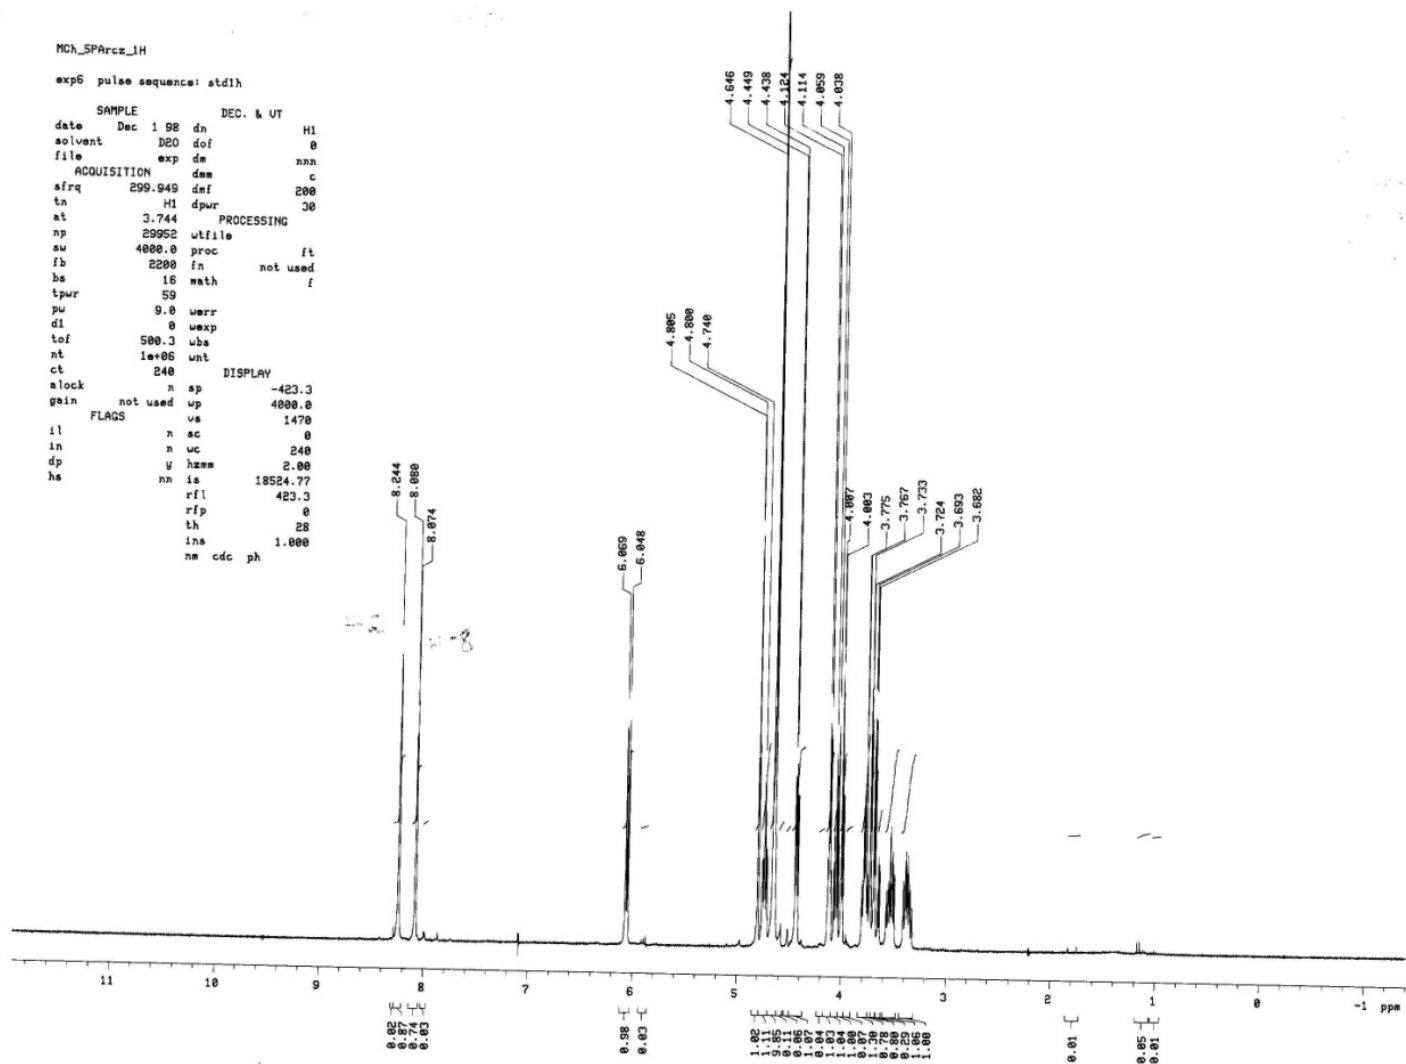

Figure S2.  $^{13}\text{C}$ -NMR of Compound 7a.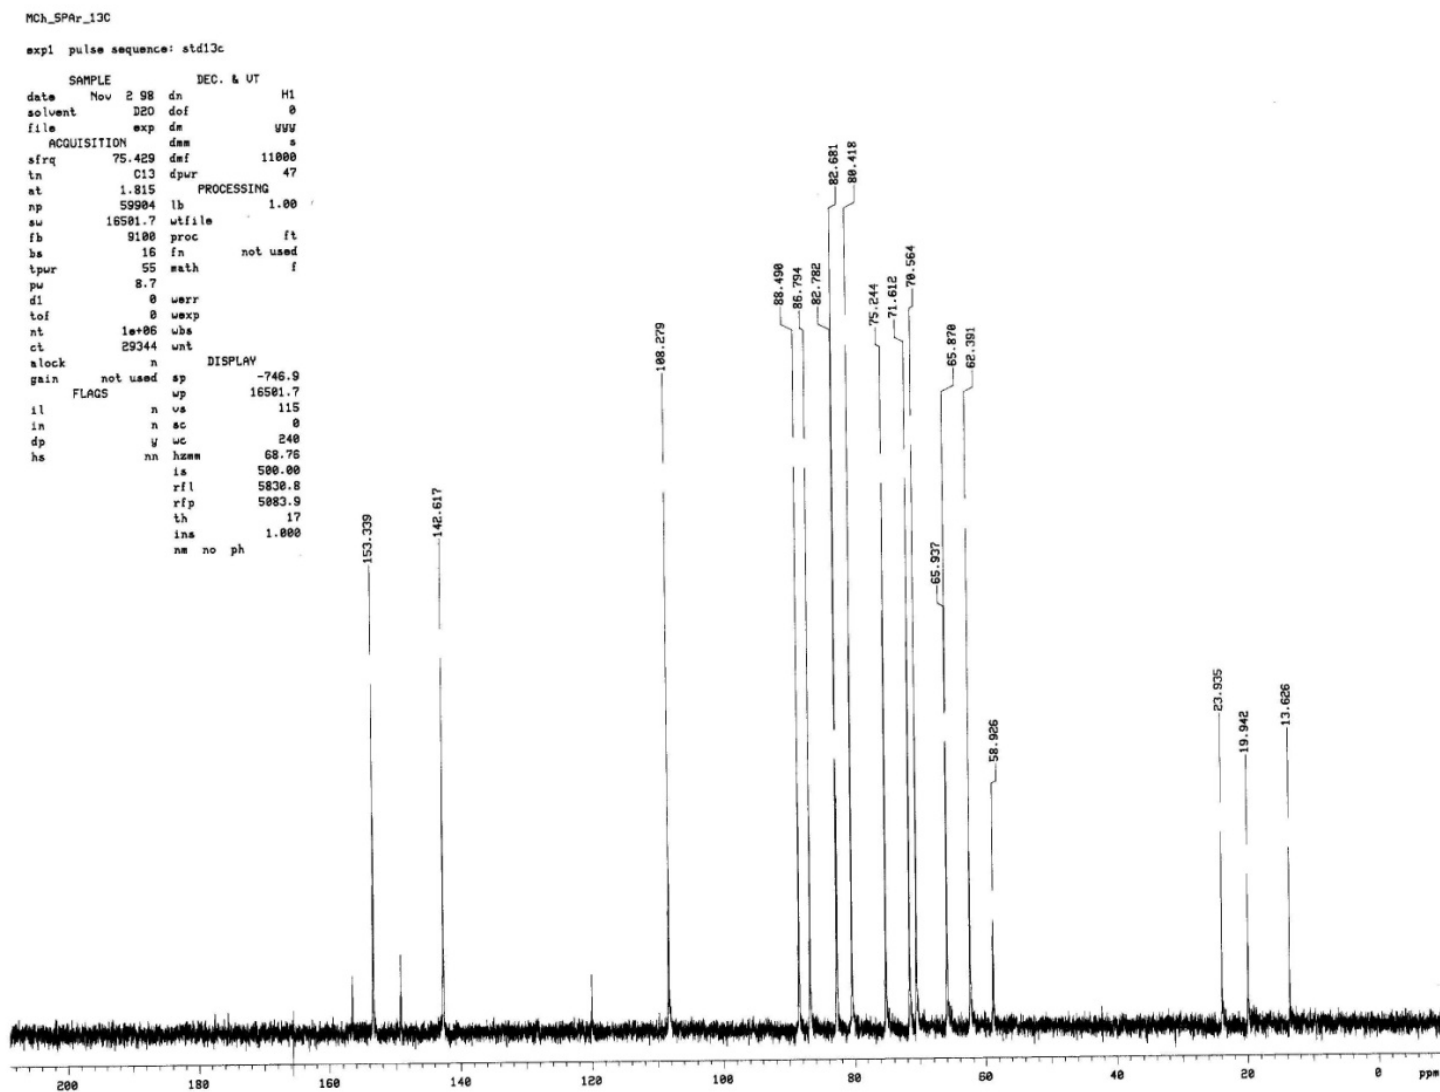

Figure S3.  $^{31}\text{P}$ -NMR of Compound 7a.

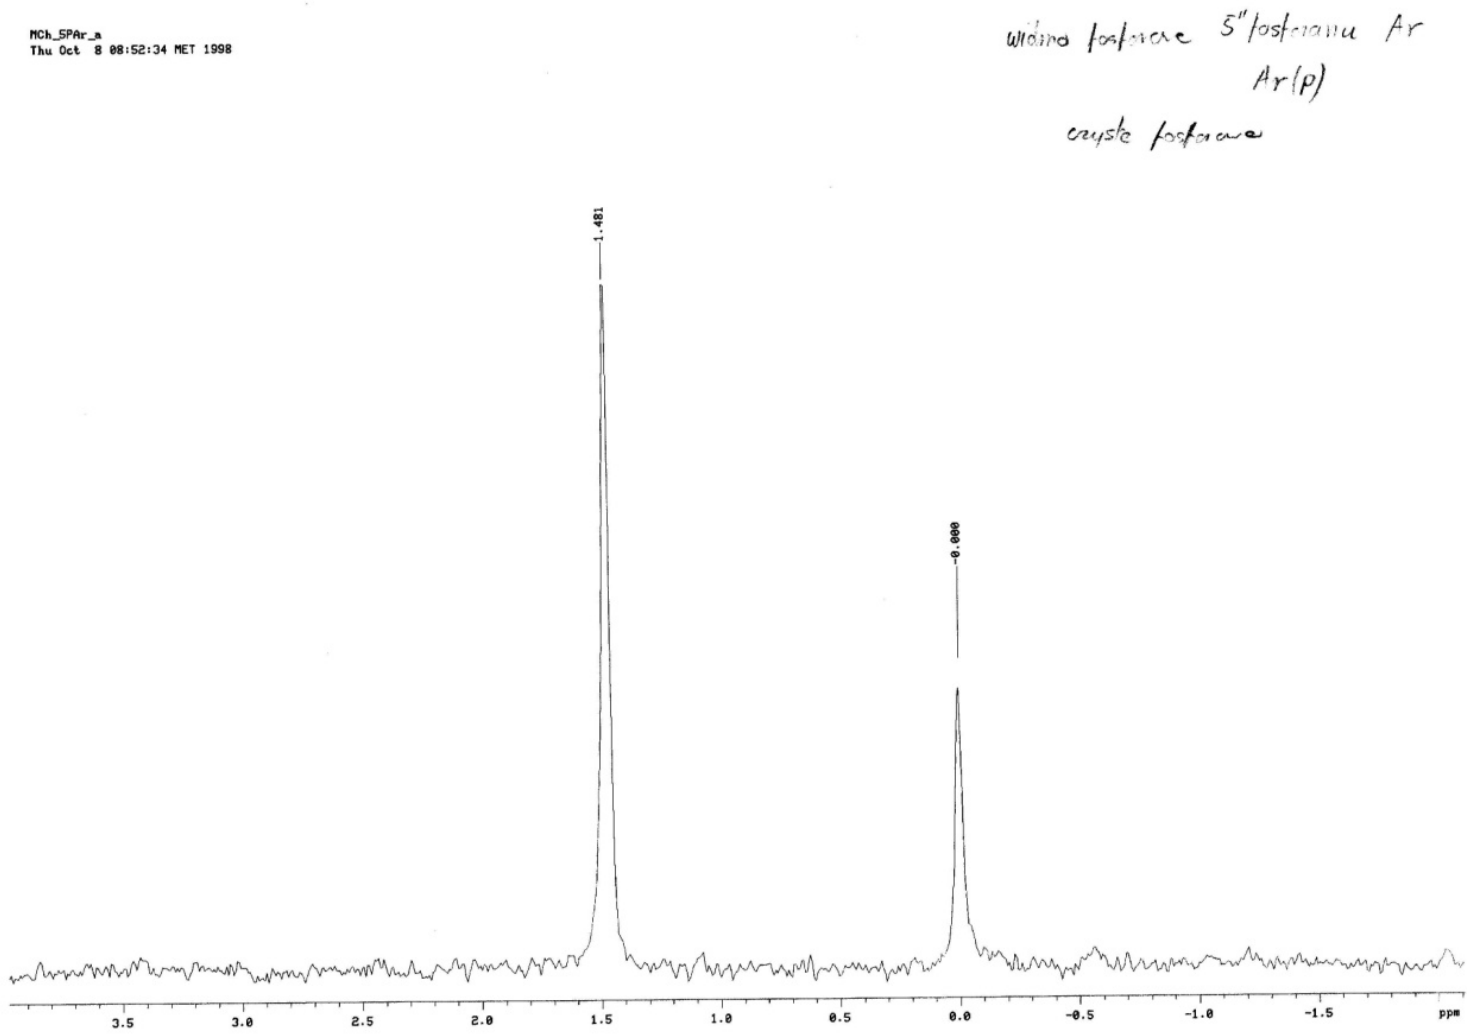

Figure S4. MS Analysis 1 of Compound 7a.

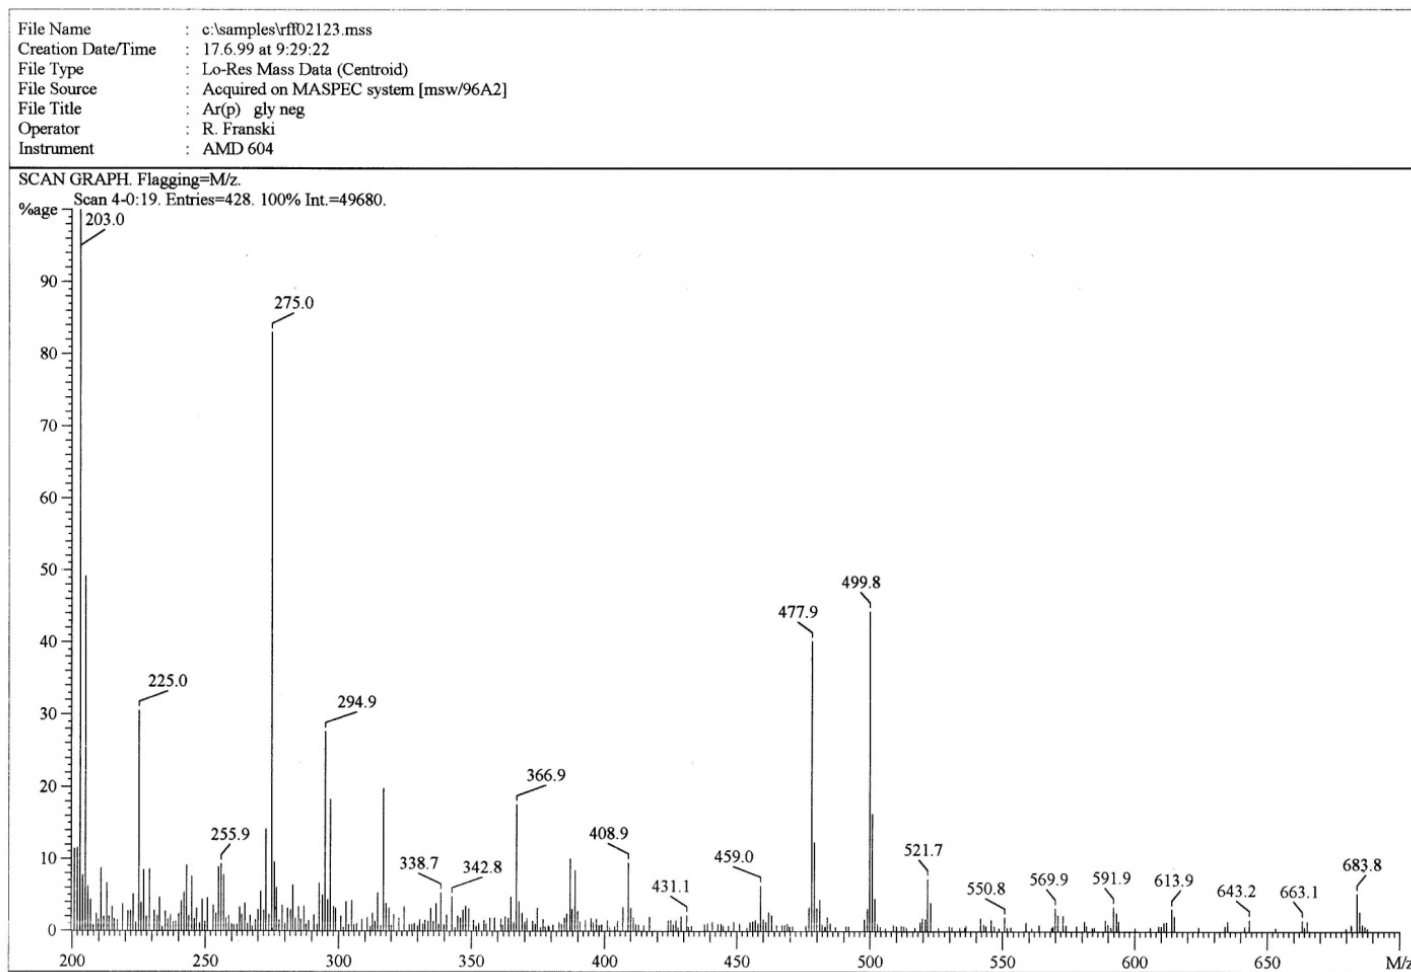

Figure S5. MS Analysis 2 of Compound 7a.

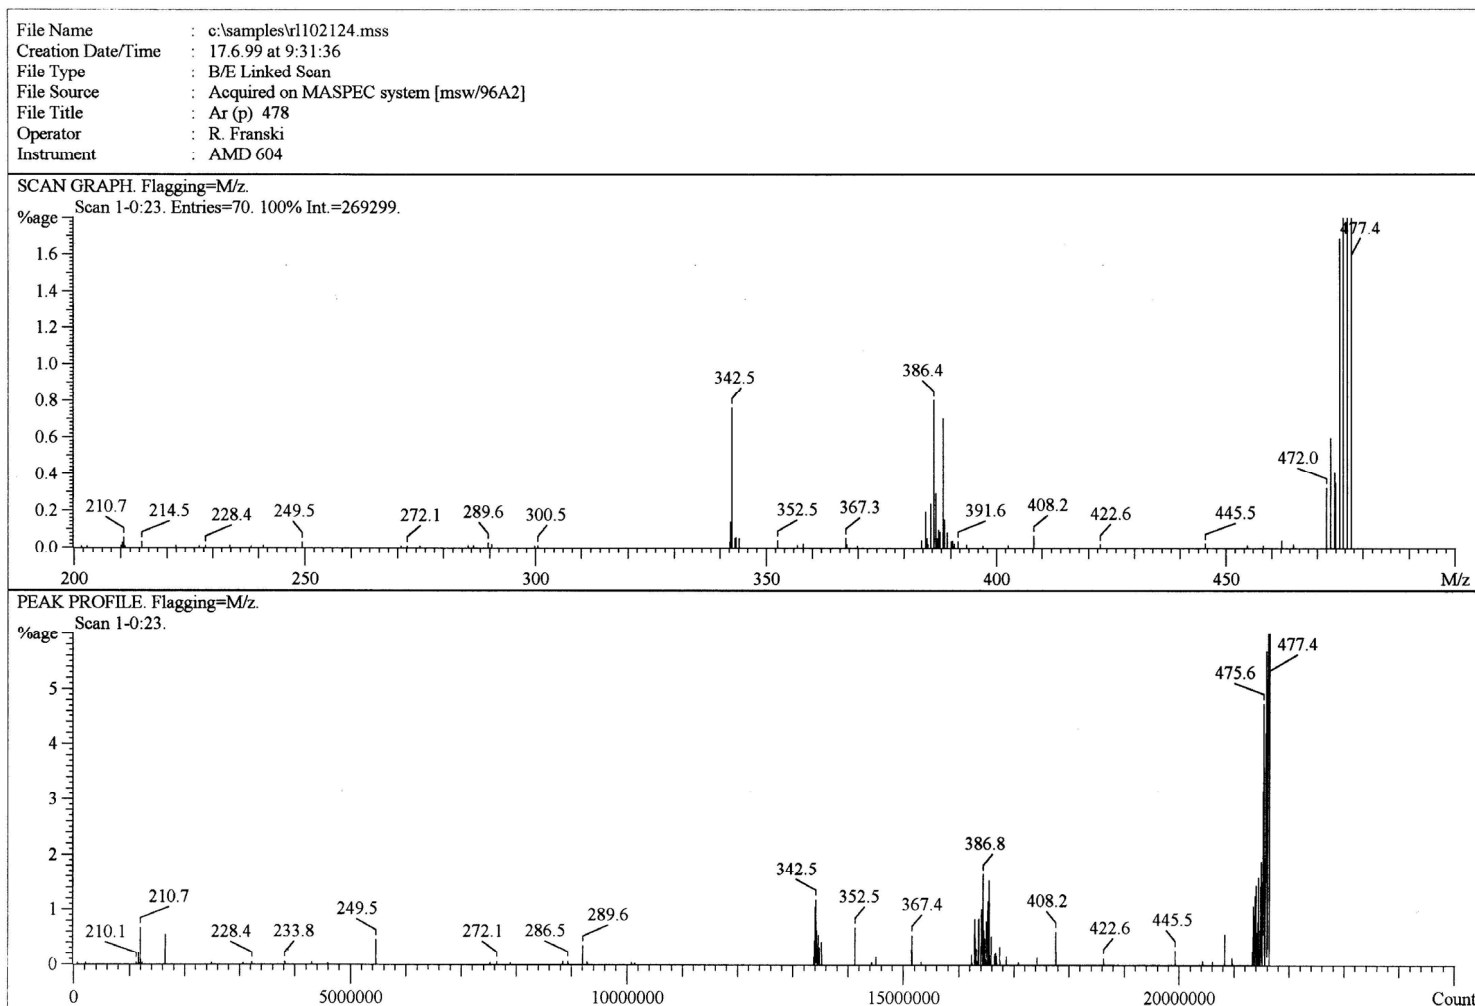

Figure S6. <sup>1</sup>H-NMR of Compound 7b.

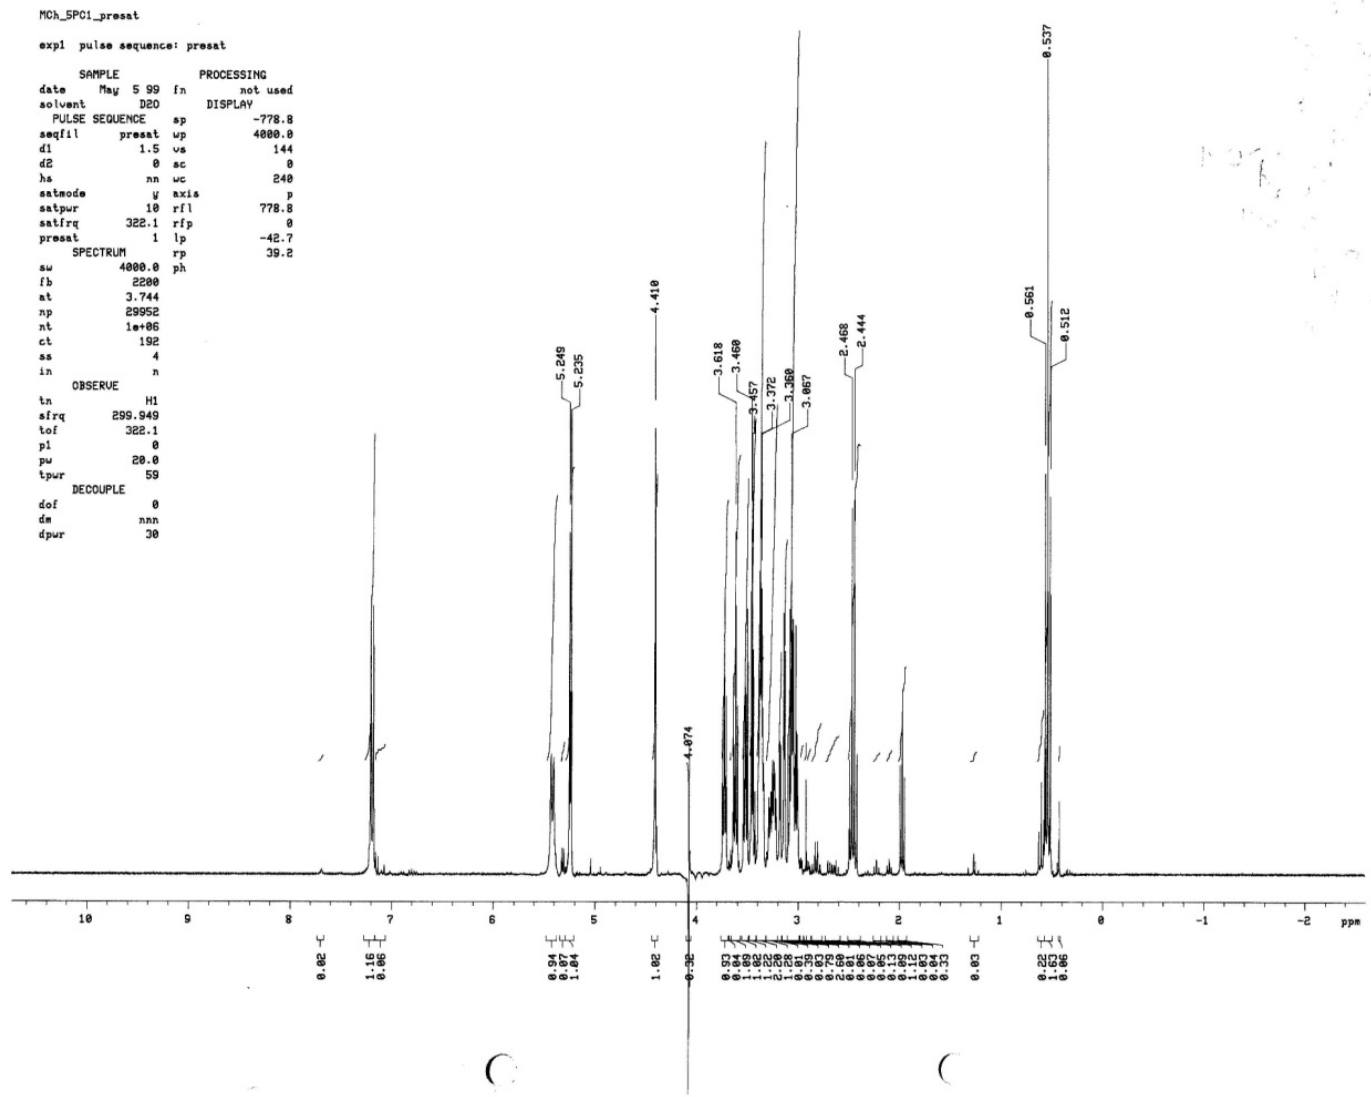

Figure S7.  $^{13}\text{C}$ -NMR of Compound 7b.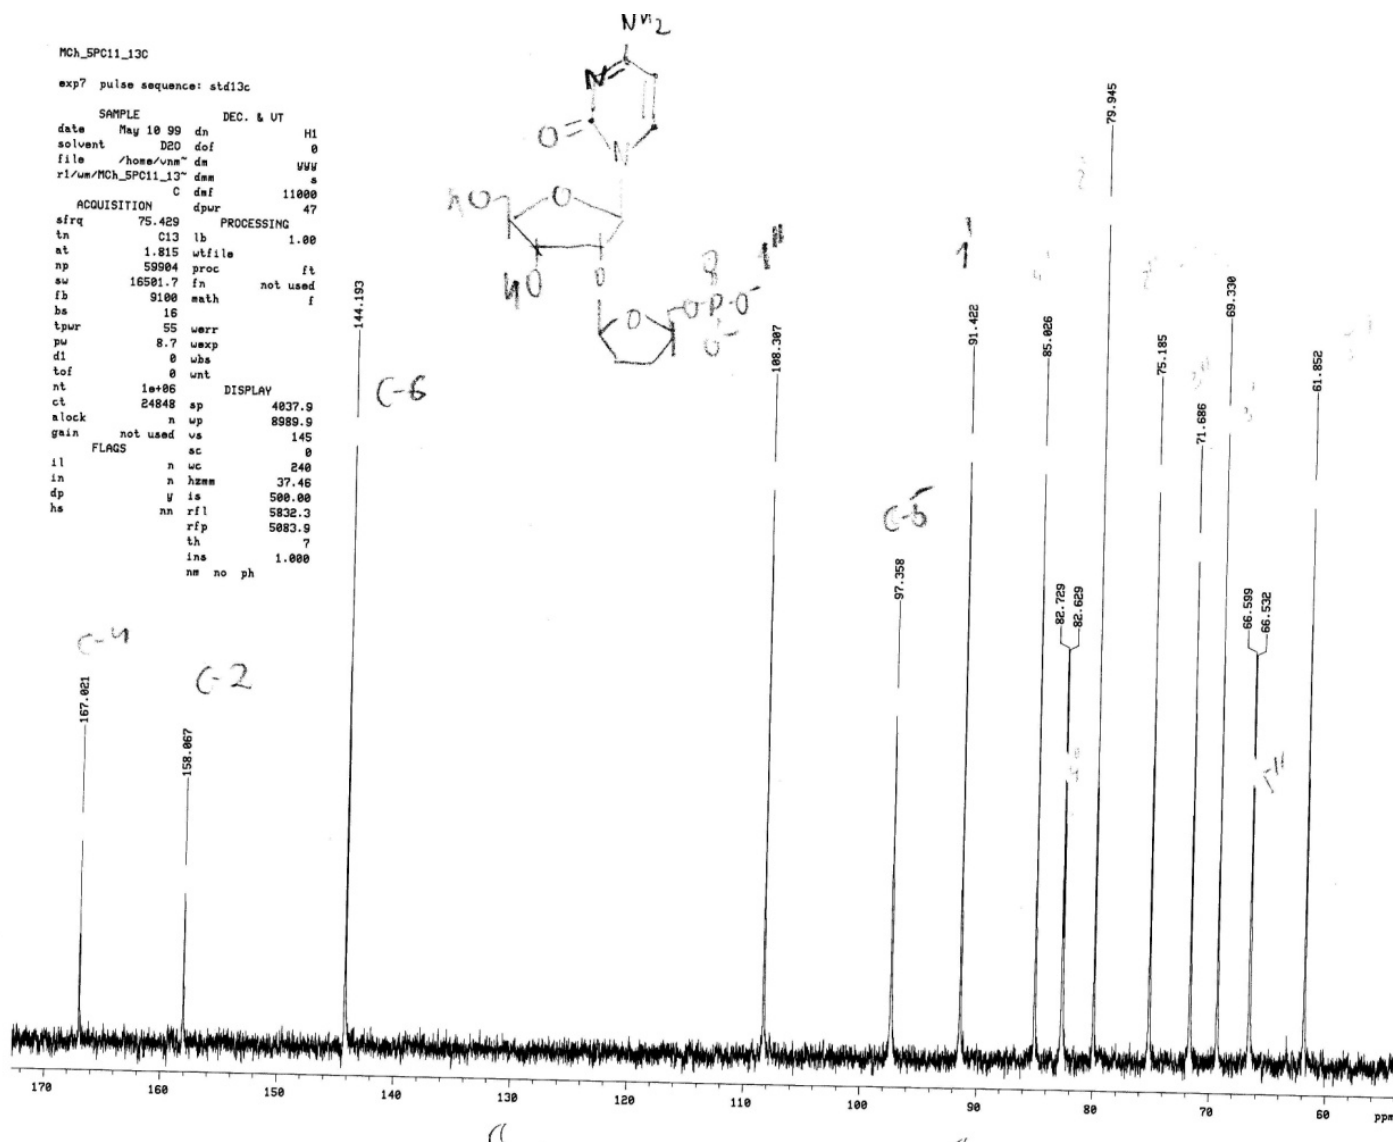

Figure S8.  $^{31}\text{P}$ -NMR of Compound 7b.

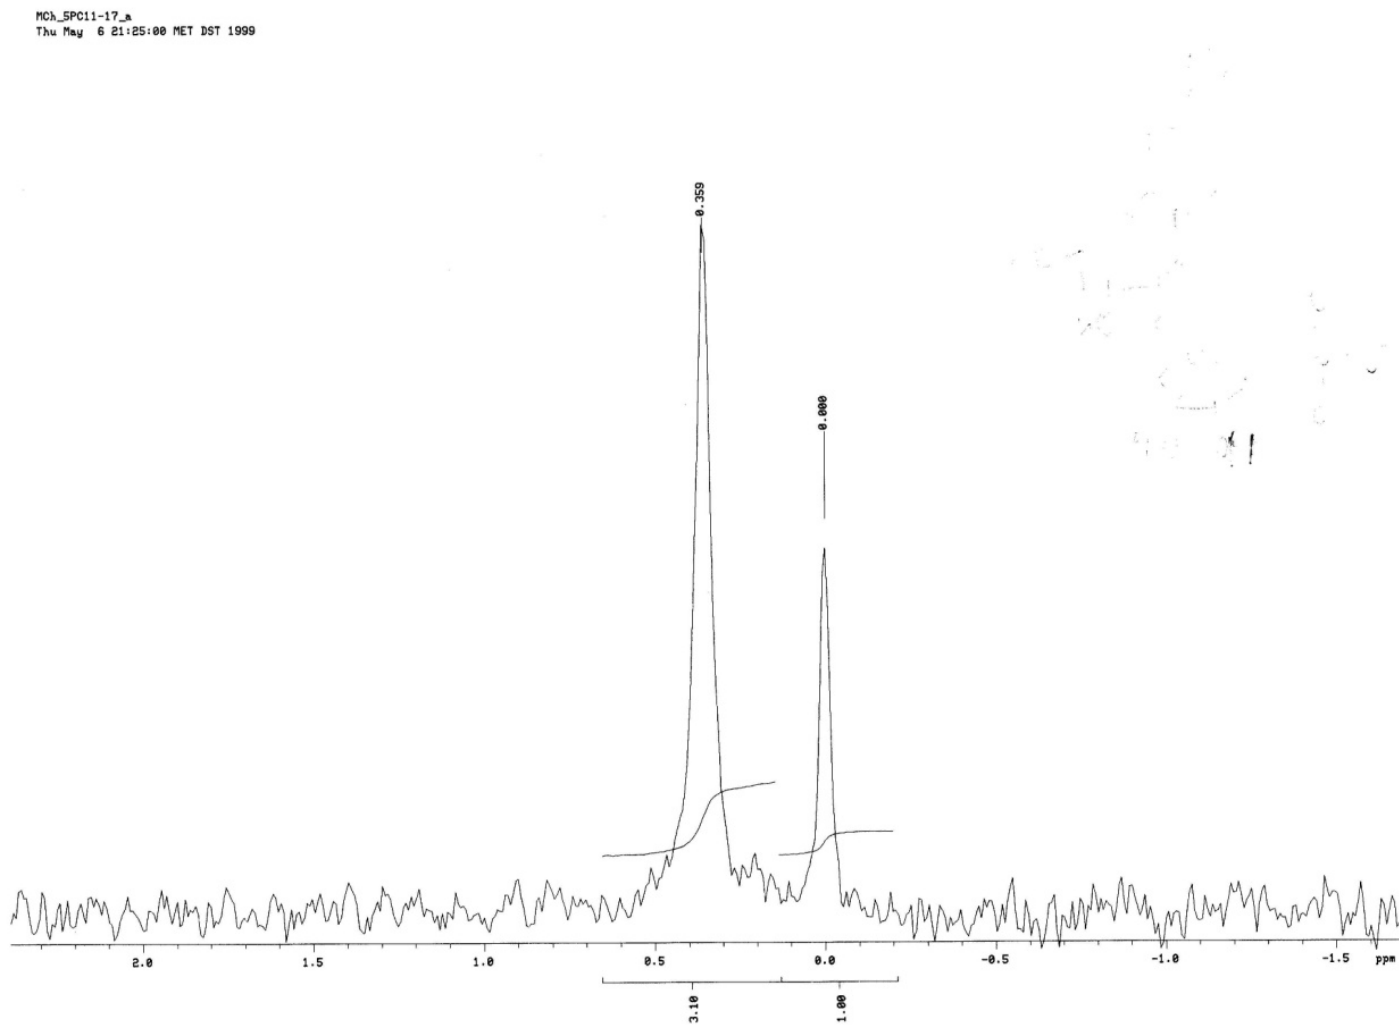



Figure S9. MS Analysis 1 of Compound 7b.

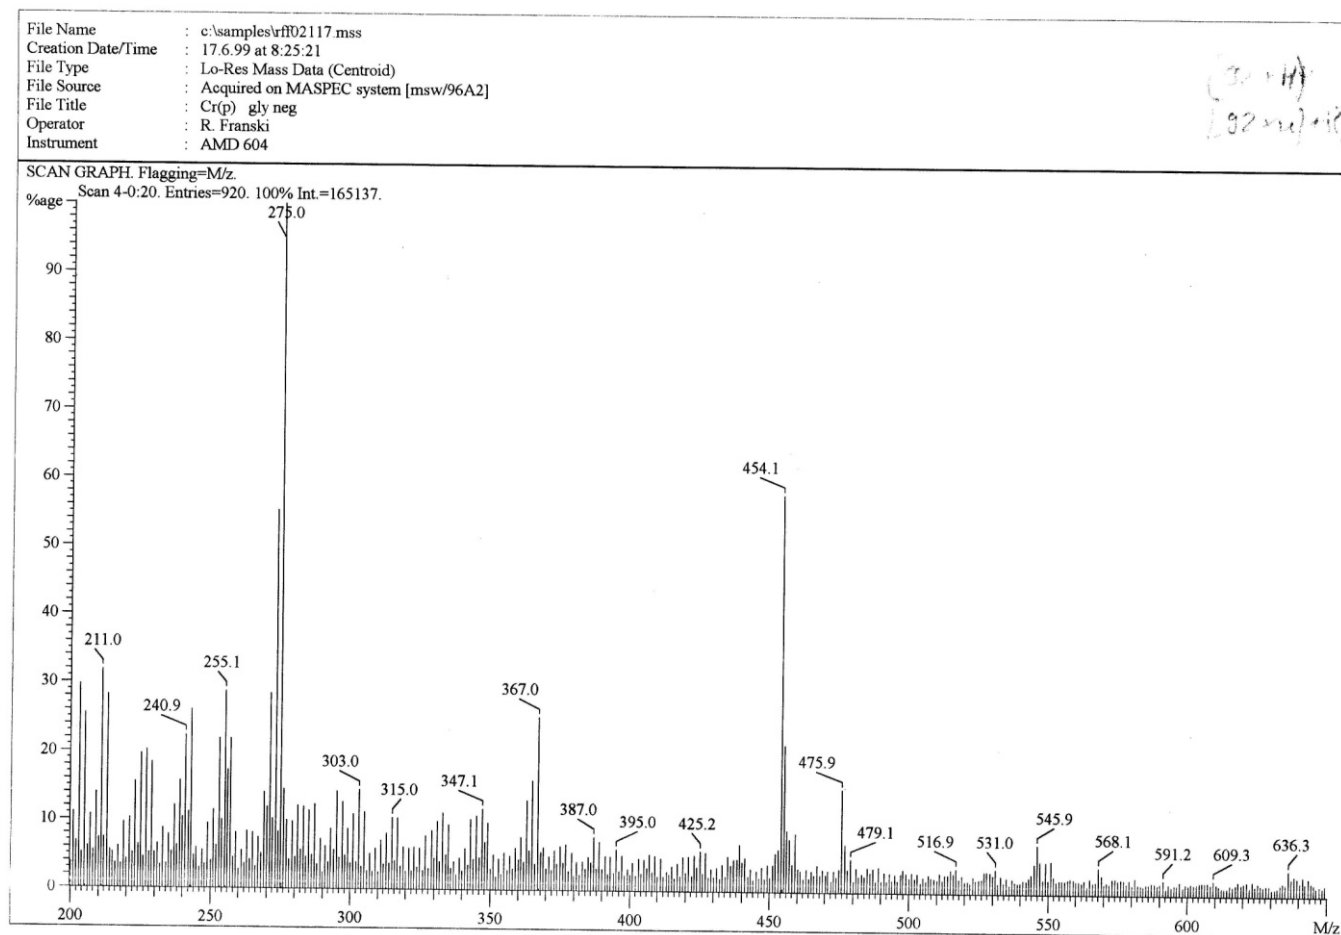

Figure S10. MS Analysis 2 of Compound 7b.

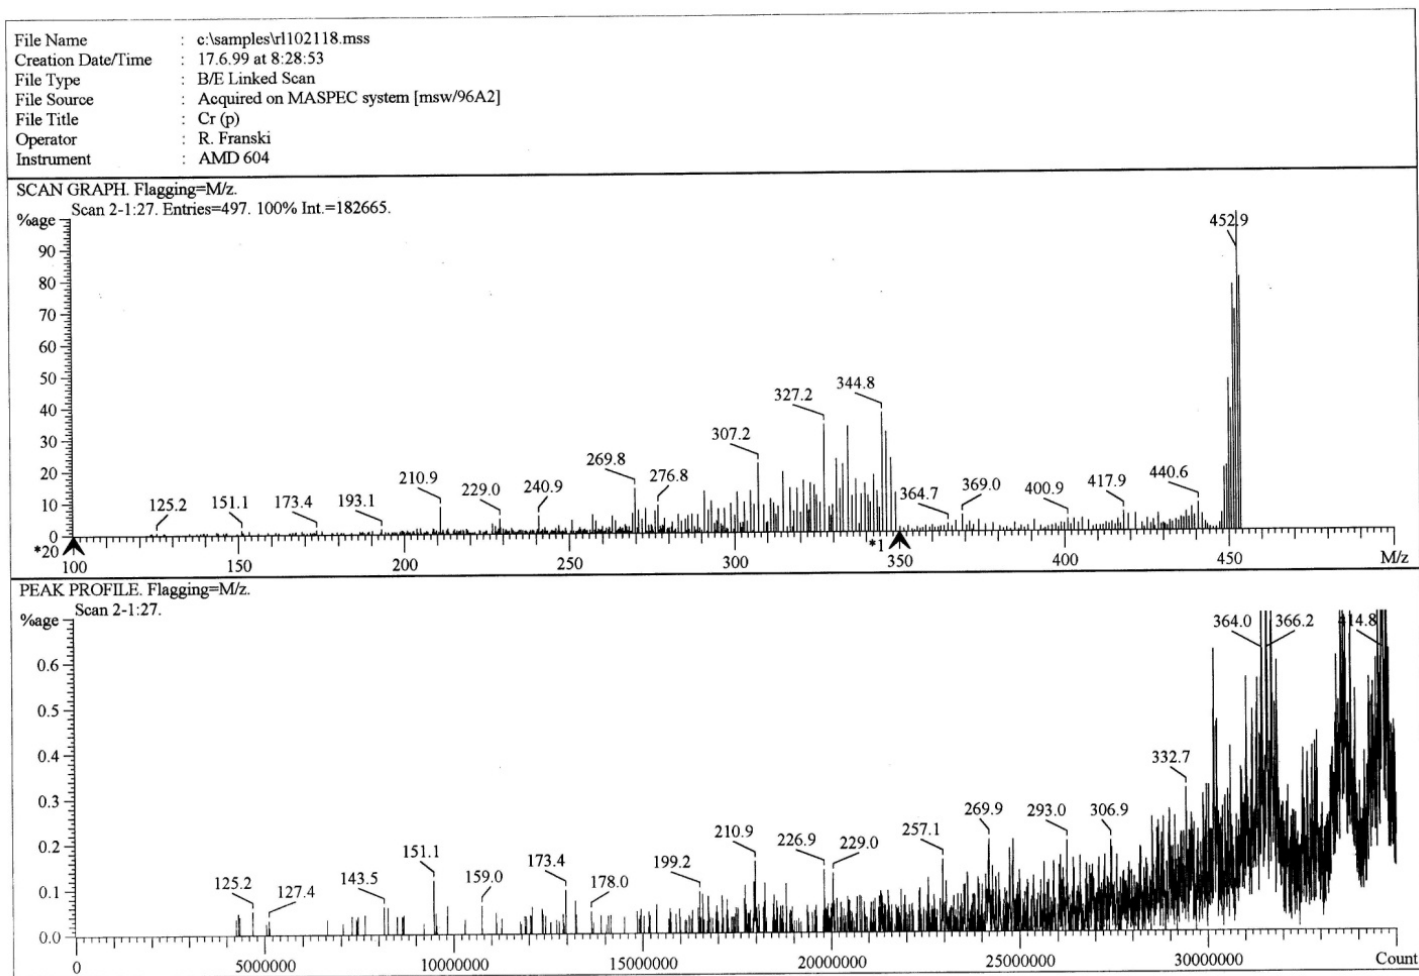

Figure S11. <sup>1</sup>H-NMR of Compound 7c.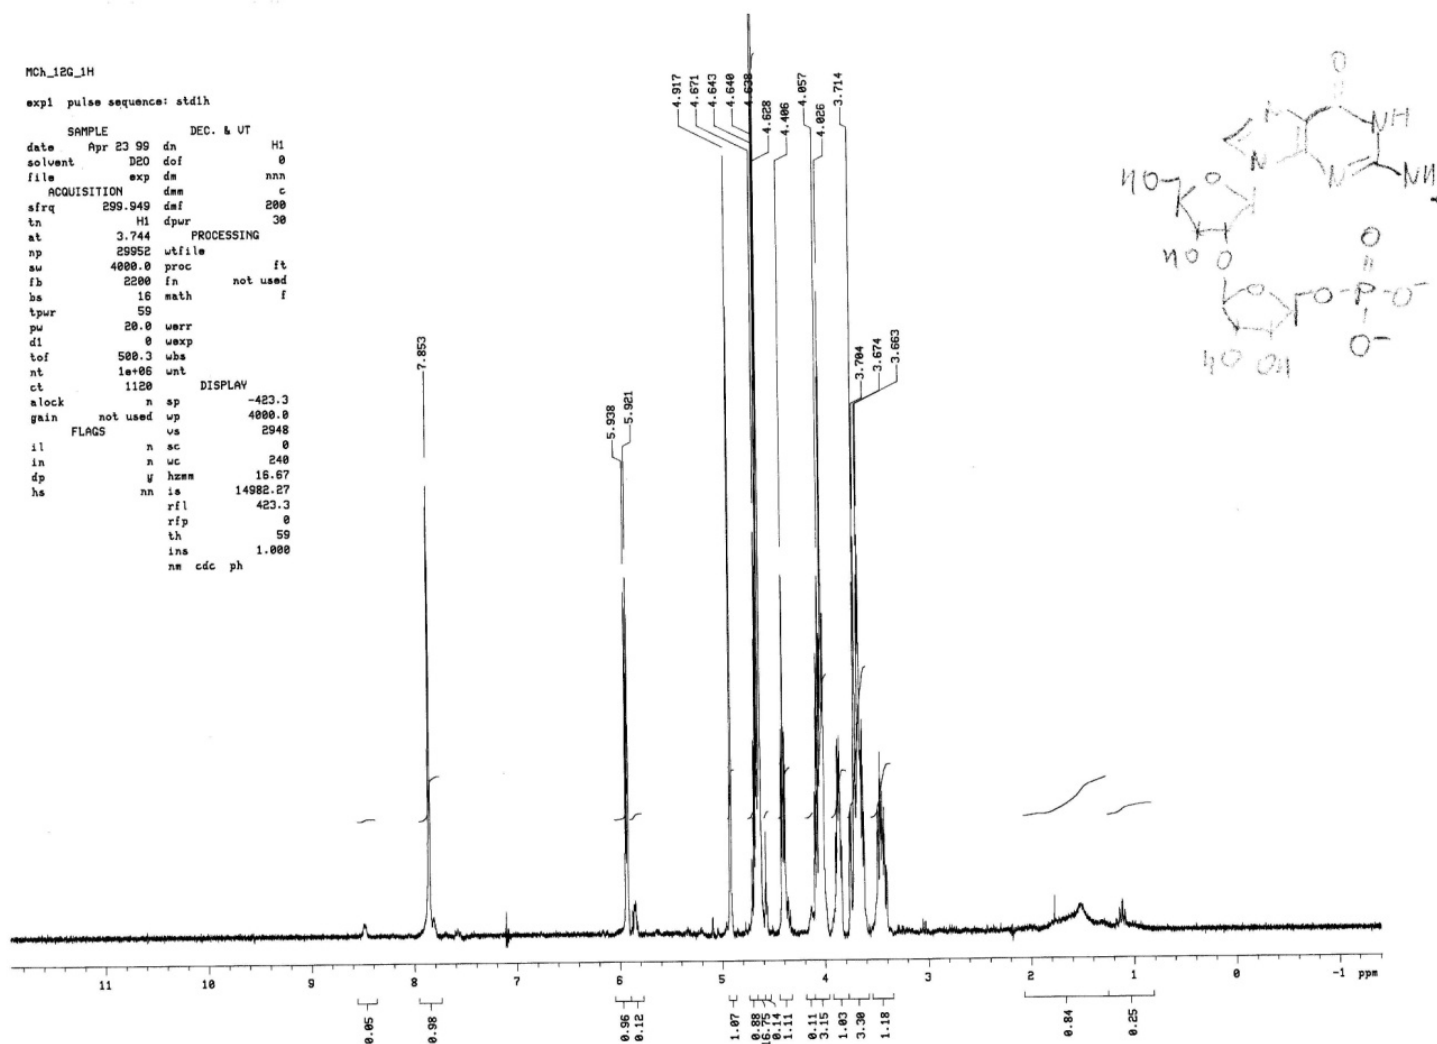

Figure S12.  $^{13}\text{C}$ -NMR of Compound 7c.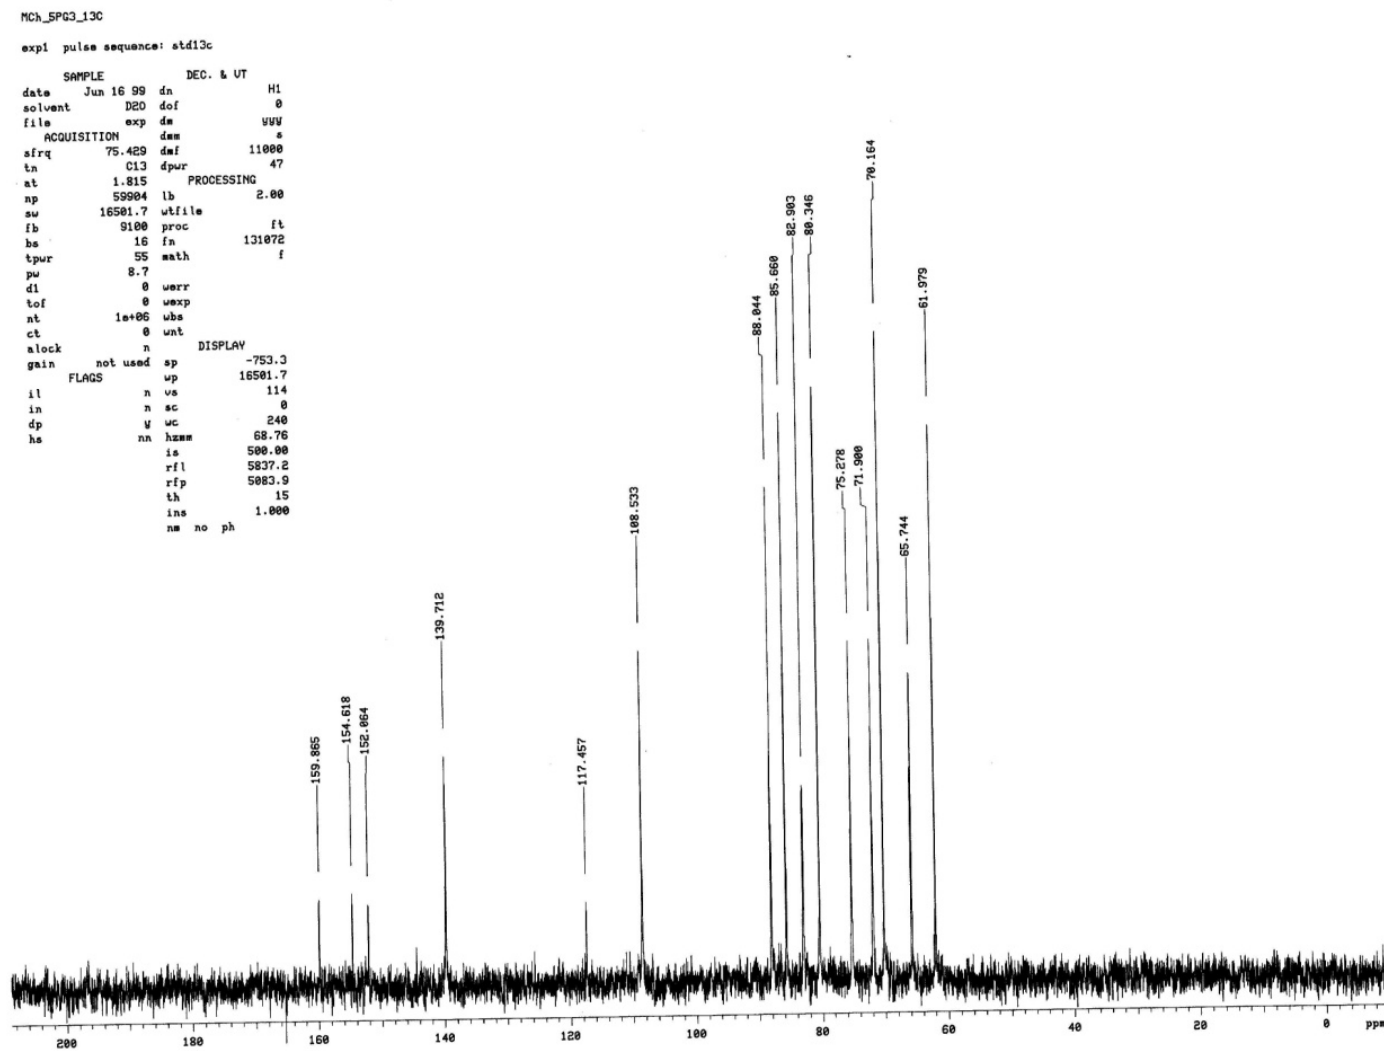

Figure S13.  $^{31}\text{P}$ -NMR of Compound 7c.

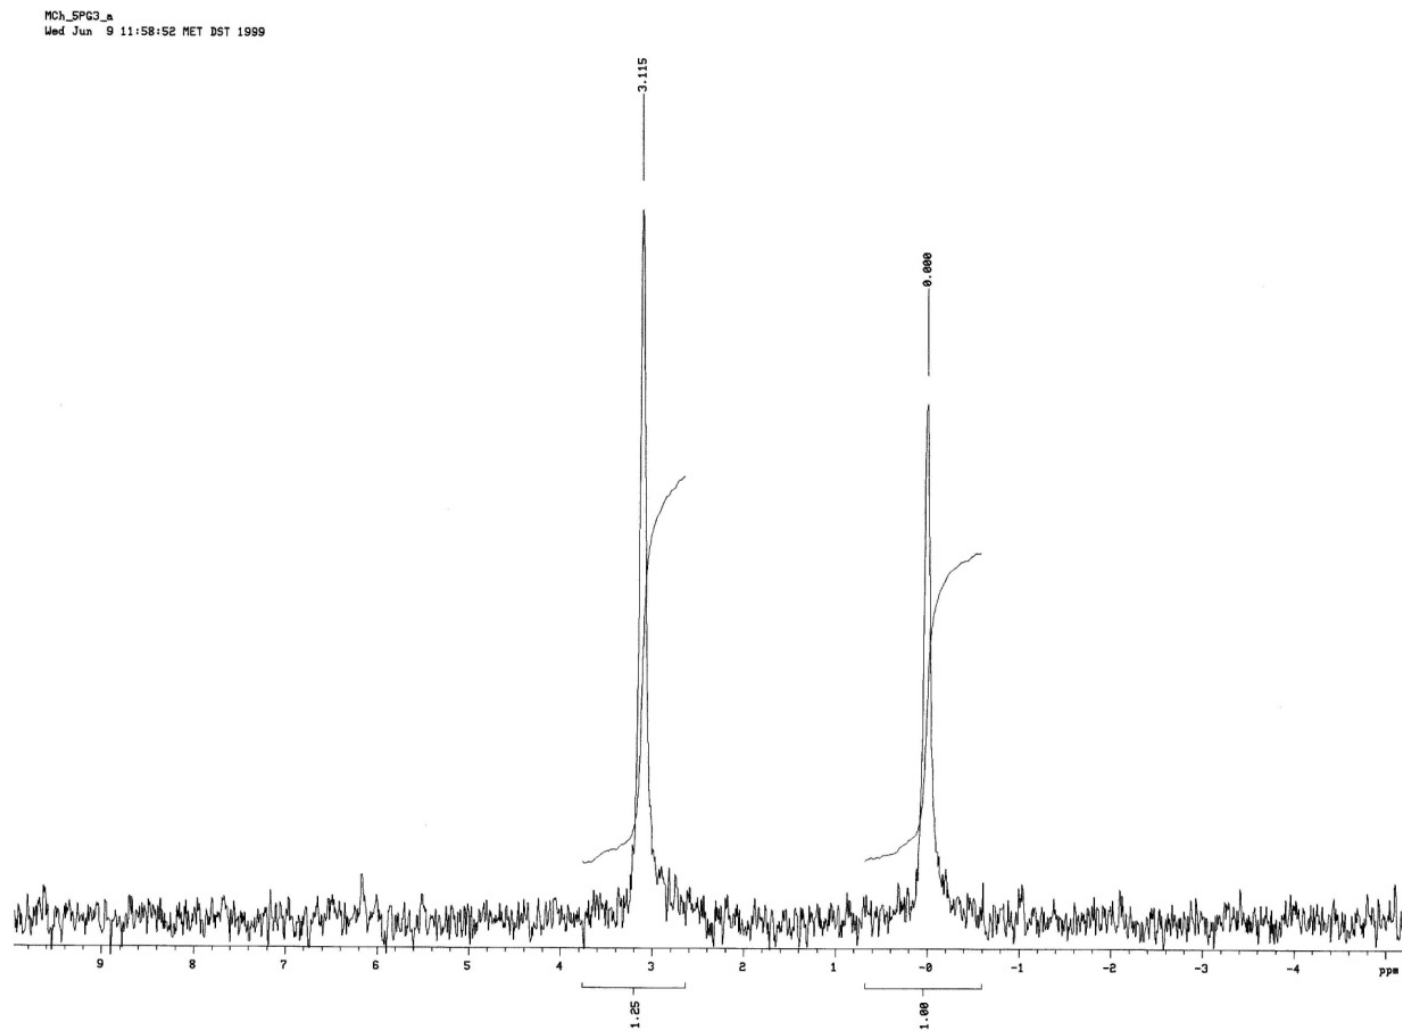

Figure S14. MS Analysis 1 of Compound 7c.

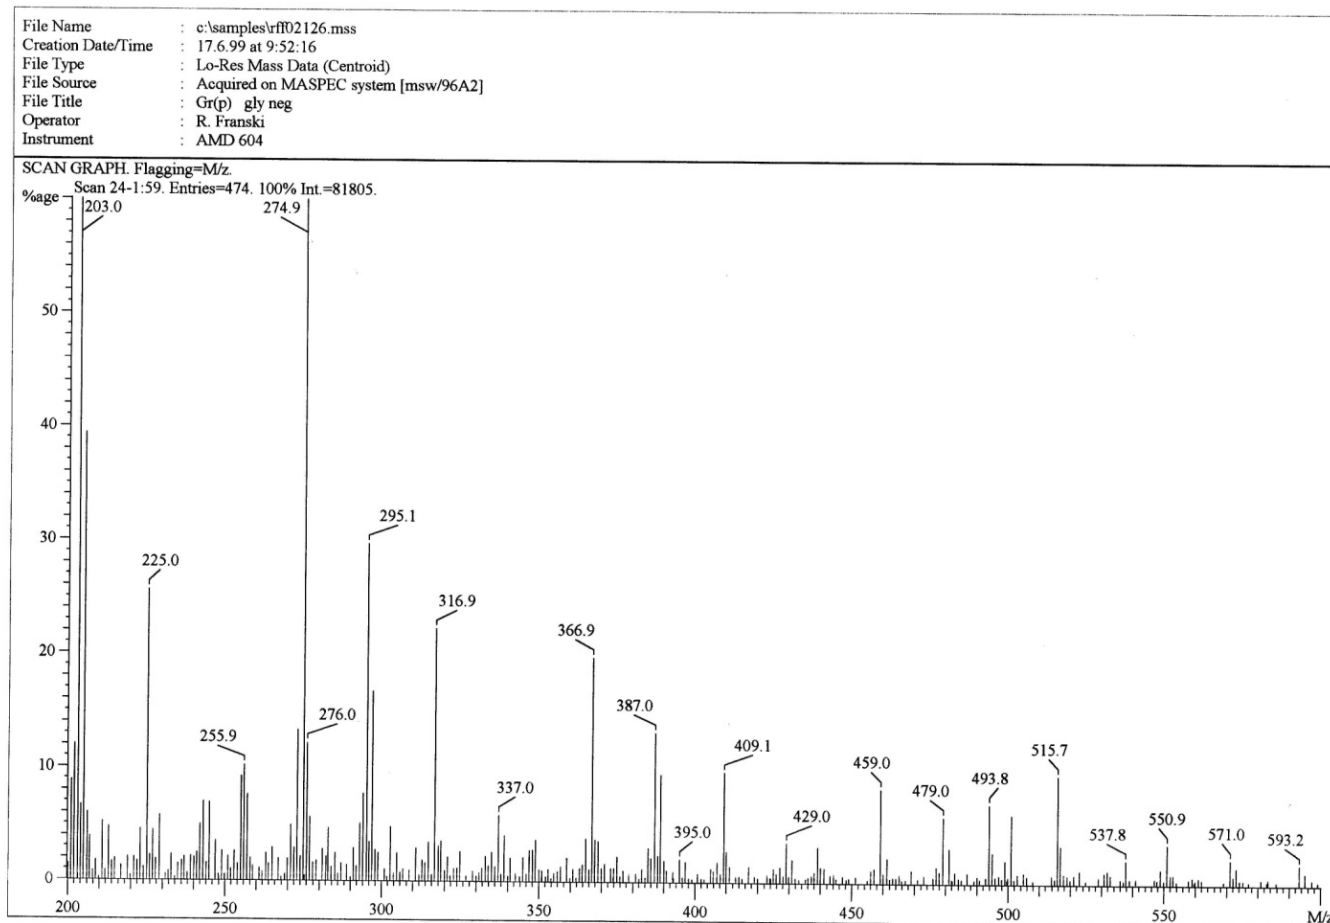

Figure S15. MS Analysis 2 of Compound 7c.

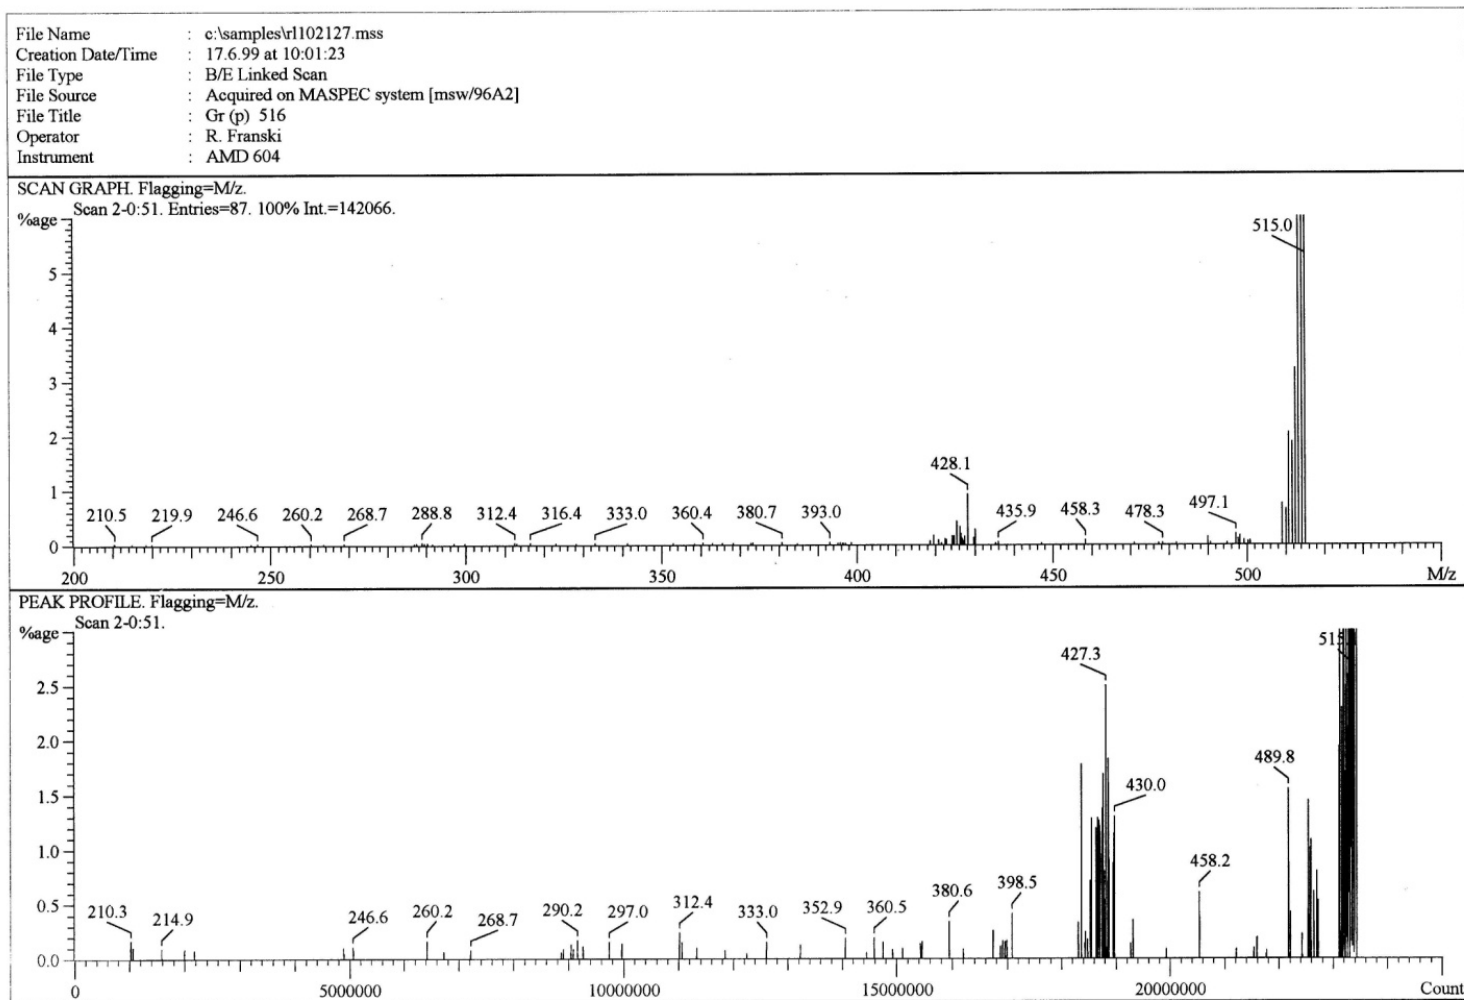

Figure S16. Atomic composition of Compound 7c.

ASD01828.TXT

-----  
ATOMIC COMPOSITION REPORT  
-----

File Name : c:\samples\test1.mss.  
File Date/Time : 17.6.99 at 10:17:11  
File Type : Hi-Res Mass Spectrum  
File Source : Acquired on MASPEC system [msw/96A2]  
          as c:\samples\rfv02128.mss  
File Title : Gr (p)  
Source File : c:\samples\rfv02128.mss  
Source Scan(s) : 8:64

Sort Field : M/z (ascending).  
Scan Filter : none.

Selected isotopes:  
-----  
Symbol Min Max V'cy Name  
-----  
C 9 18 4 Carbon-12  
H 10 23 1 Hydrogen-1  
N 0 5 3 Nitrogen-14  
O 0 14 2 Oxygen-16  
Na 0 1 1 Sodium-23  
P 0 1 3 Phosphorous-31  
-----

Allowable error = minimum of 10.0 ppm, 5.0 mmu.  
Number of Peaks=31.  
Base Peak=516.06013, 100% Int.=6716.

-----  
Mass (%) Calculated ppm mmu Formula  
-----  
494.09273 58.64 494.09244 -0.6 -0.3 C15.H21.N5.O12.P  
516.07396 99.34 516.07440 0.9 0.4 C15.H20.N5.O12.N  
a.P  
-----

\*\*\*\*\* End of Atomic Composition Report \*\*\*\*\*



Figure S17. <sup>1</sup>H-NMR of Compound 7d.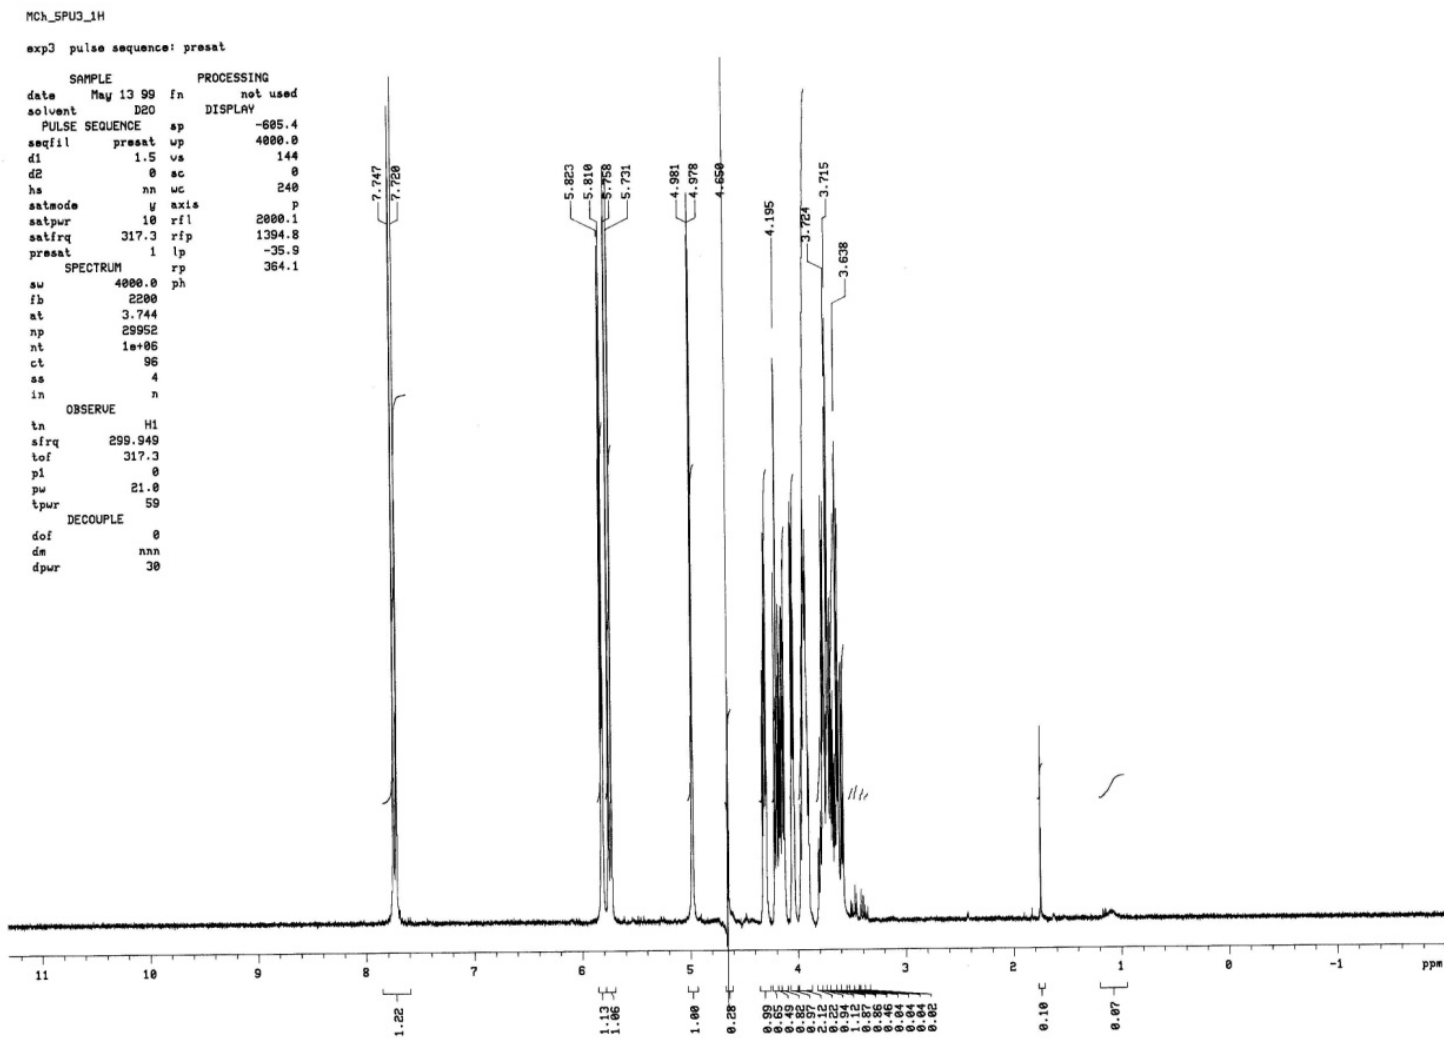

Figure S18.  $^{13}\text{C}$ -NMR of Compound 7d.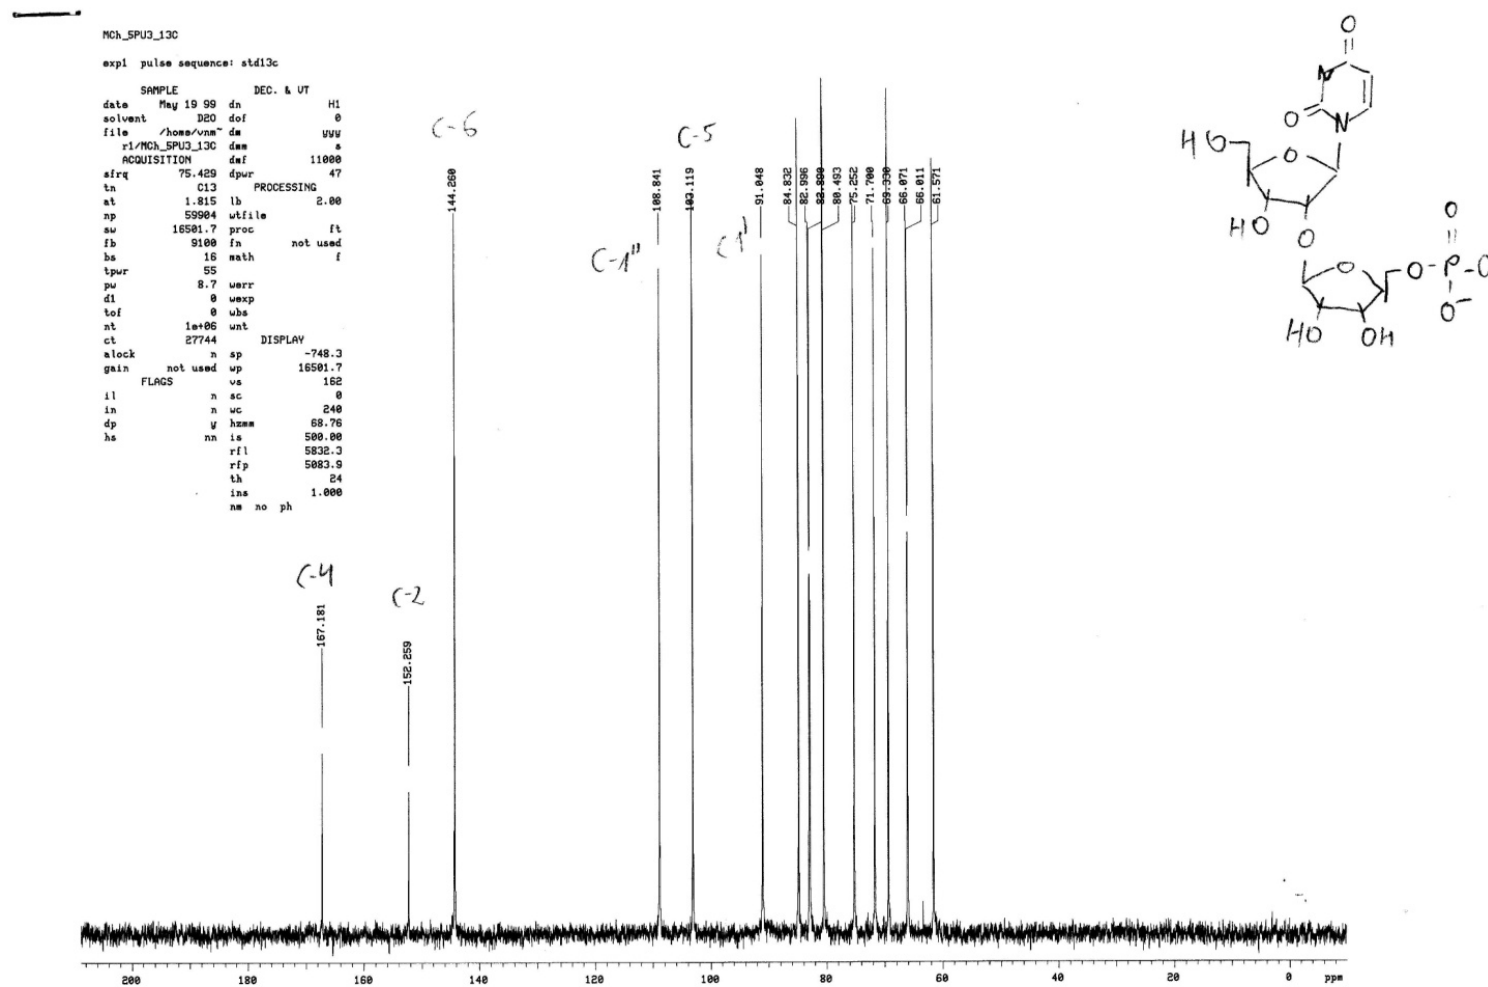

Figure S19.  $^{31}\text{P}$ -NMR of Compound 7d.

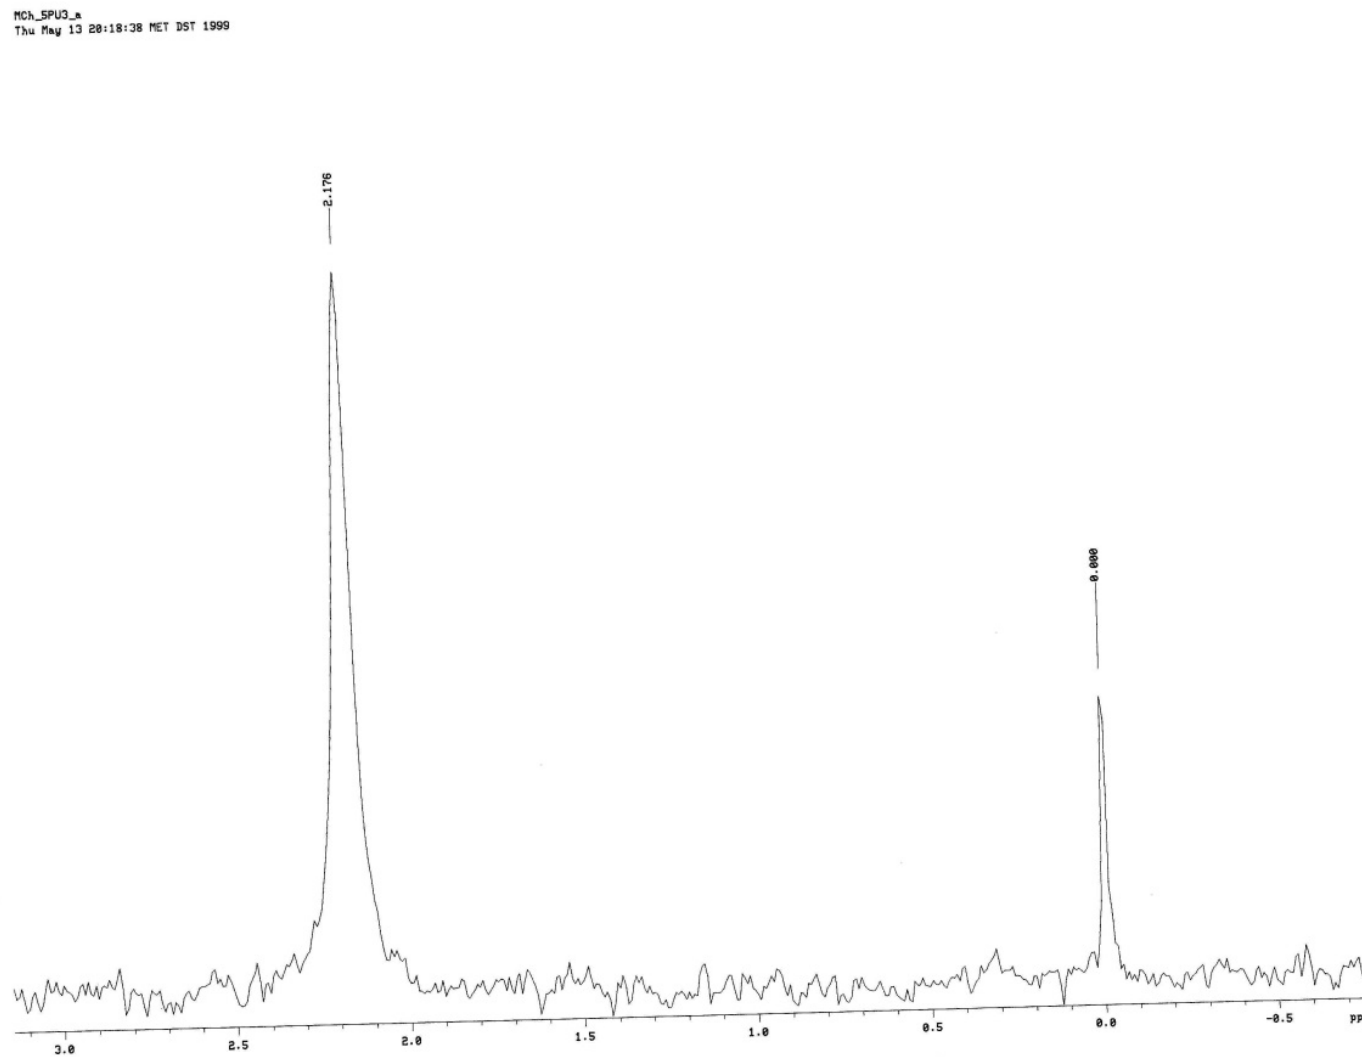

Figure S20. MS Analysis 1 of Compound 7d.

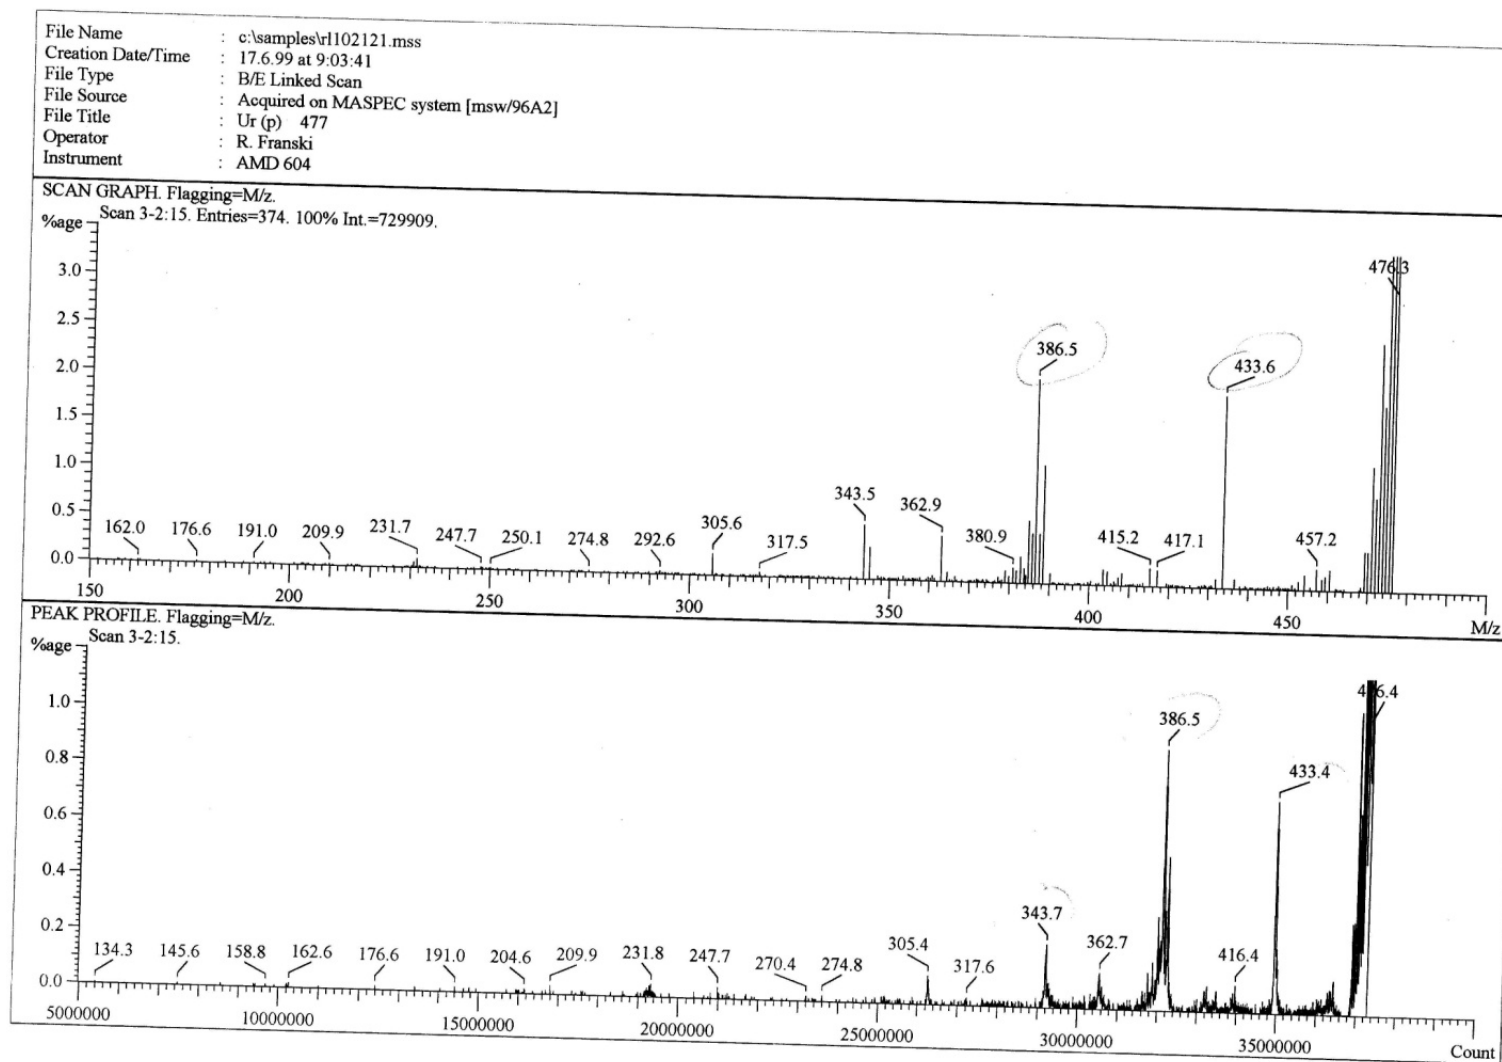

Figure S21. MS Analysis 2 of Compound 7d.

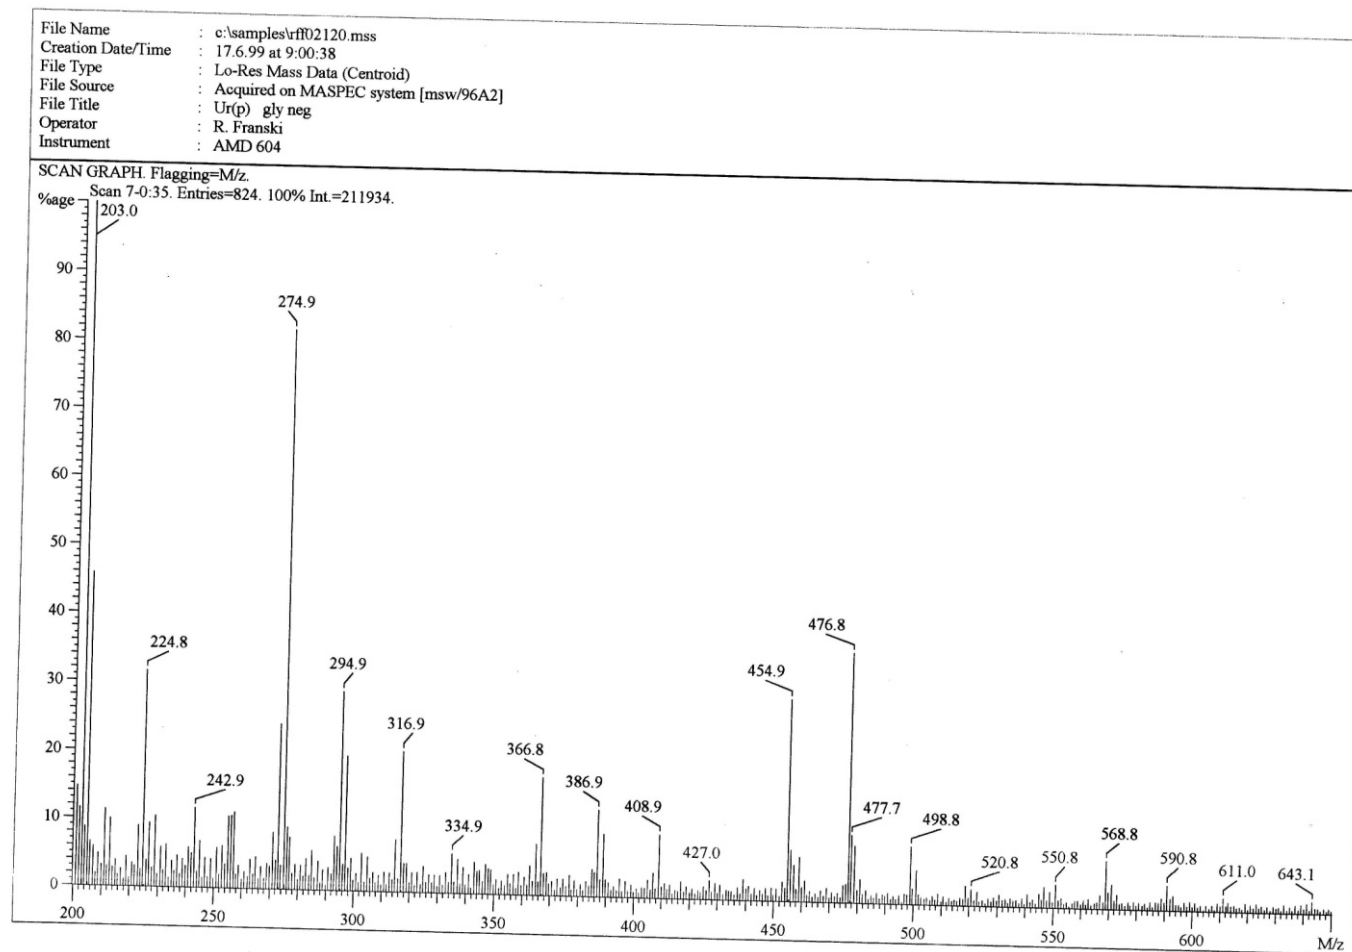

Figure S22. Atomic composition of Compound 7d.

ASD01828.TXT

ATOMIC COMPOSITION REPORT

-----

File Name : c:\samples\test1.mss.  
File Date/Time : 17.6.99 at 9:10:22  
File Type : Hi-Res Mass Spectrum  
File Source : Acquired on MASPEC system [msw/96A2]  
              as c:\samples\rfv02122.mss  
File Title : Ur (p)  
Source File : c:\samples\rfv02122.mss  
Source Scan(s) : 1:

Sort Field : M/z (ascending).  
Scan Filter : none.

Selected isotopes:

| Symbol | Min | Max | V'cy | Name           |
|--------|-----|-----|------|----------------|
| C      | 9   | 17  | 4    | Carbon-12      |
| H      | 10  | 22  | 1    | Hydrogen-1     |
| N      | 0   | 2   | 3    | Nitrogen-14    |
| O      | 0   | 13  | 2    | Oxygen-16      |
| Na     | 0   | 1   | 1    | Sodium-23      |
| P      | 0   | 1   | 3    | Phosphorous-31 |

-----

Allowable error = minimum of 10.0 ppm, 5.0 mmu.

Number of Peaks=36.  
Base Peak=477.06033, 100% Int.=9866.

| Mass      | (%)   | Calculated | ppm | mmu | Formula                 |
|-----------|-------|------------|-----|-----|-------------------------|
| 455.07004 | 53.88 | 455.07031  | 0.6 | 0.3 | C14.H20.N2.O13.P        |
| 477.05220 | 83.48 | 477.05225  | 0.1 | 0.0 | C14.H19.N2.O13.N<br>a.P |

\*\*\*\*\* End of Atomic Composition Report \*\*\*\*\*

Figure S23.  $^{31}\text{P}$ -NMR of Compound 9a.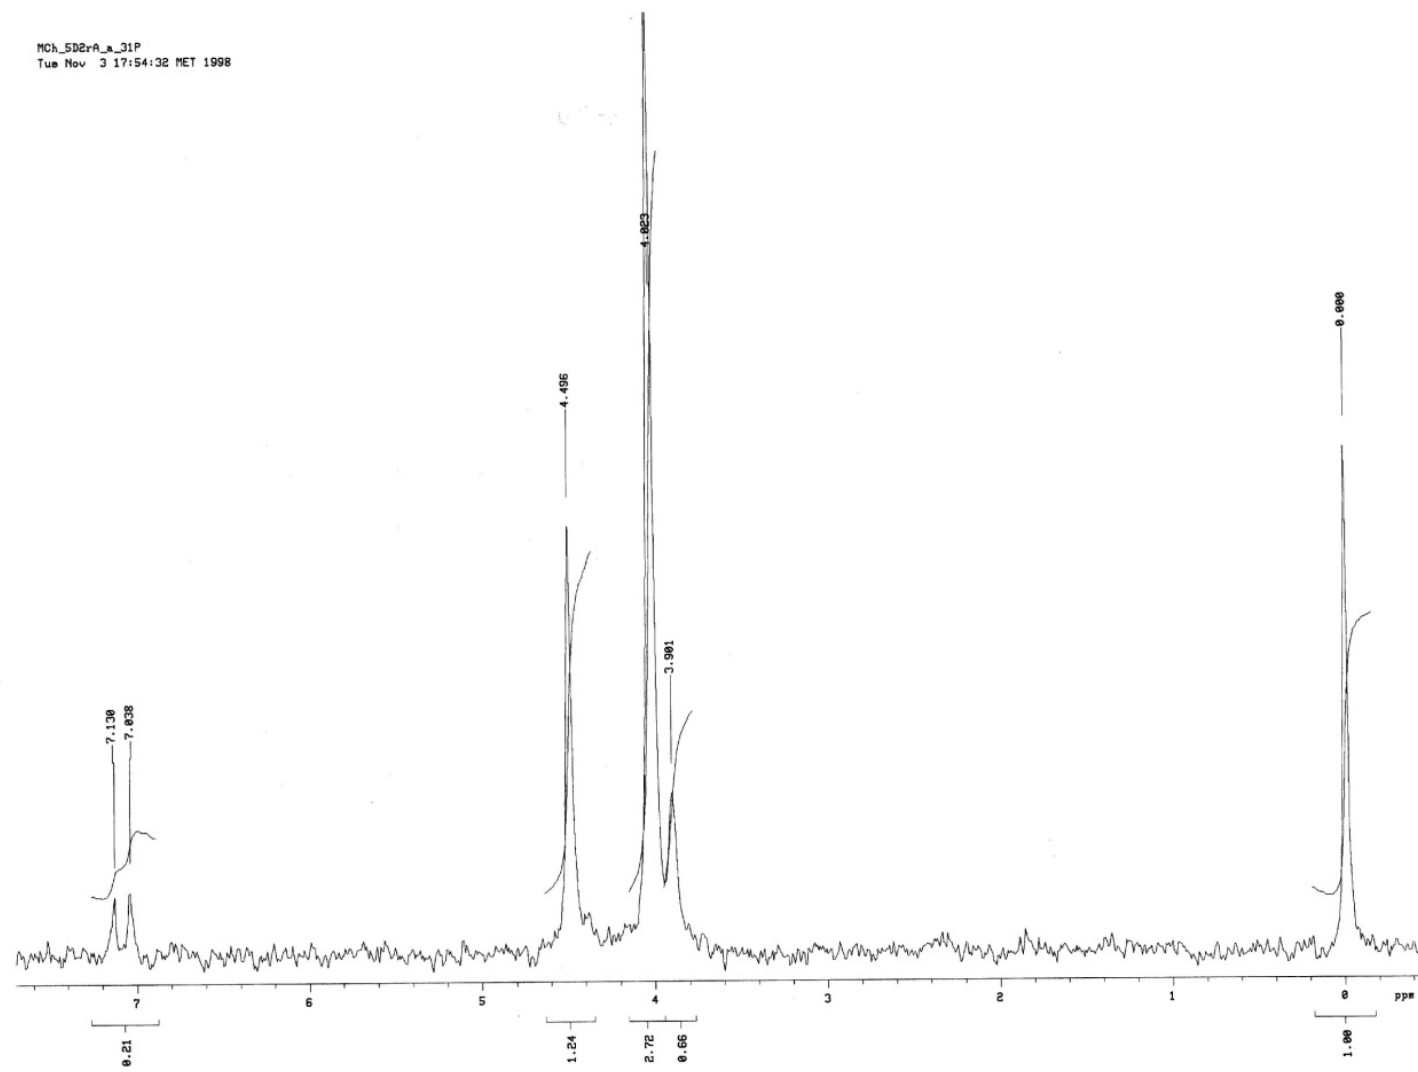

Figure S24. MS Analysis of Compound 9a.

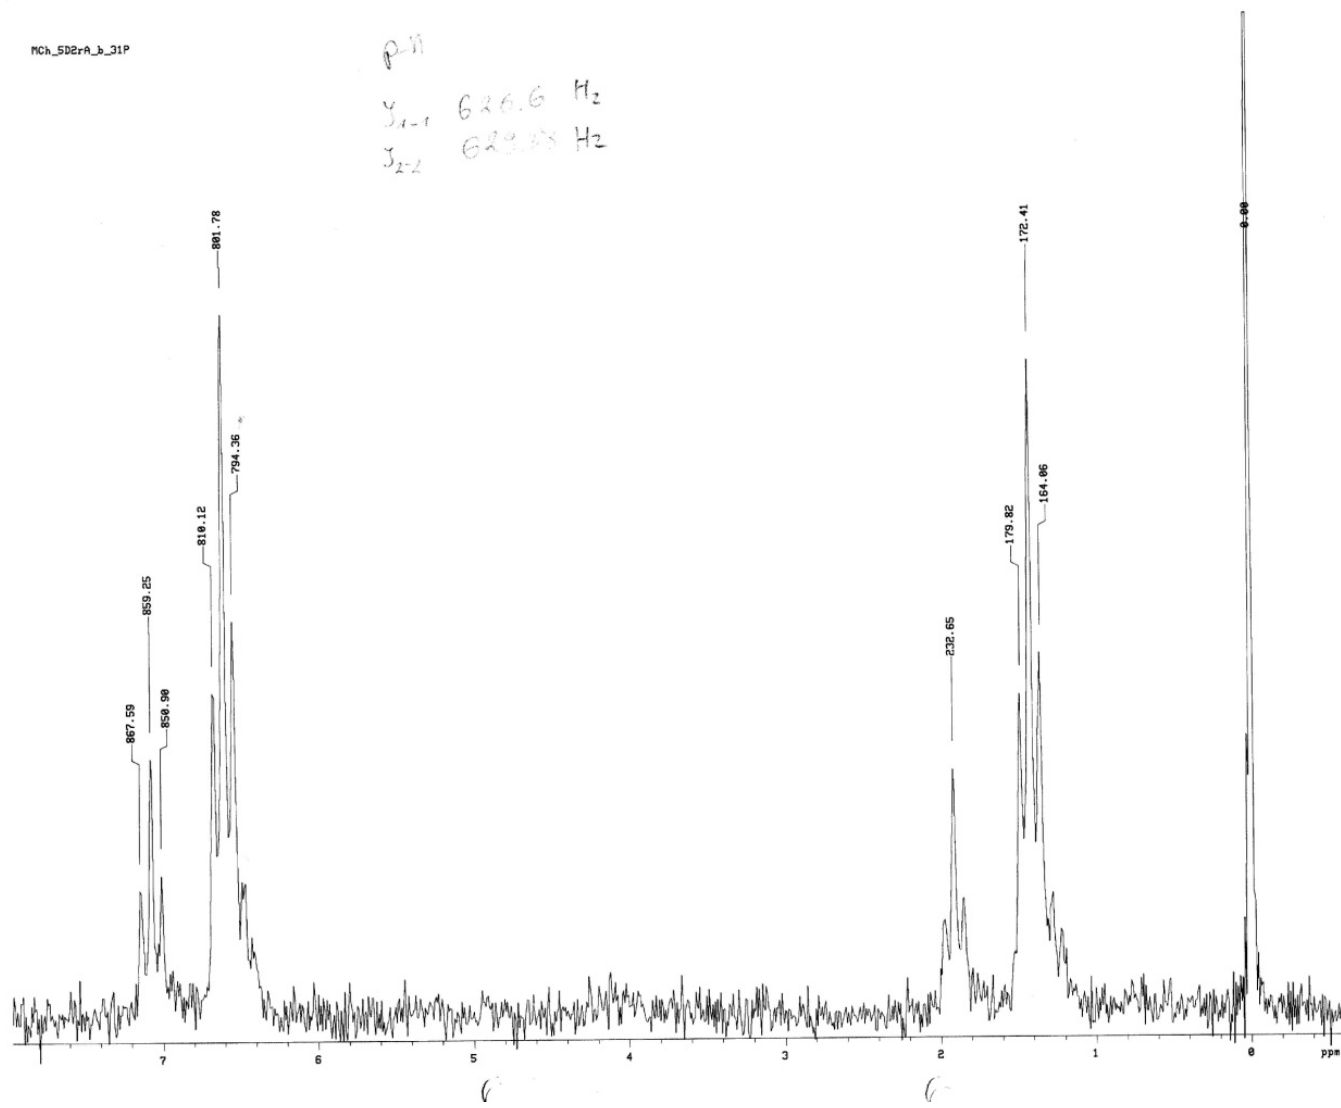



Figure S25. MS Analysis of Compound 9a.

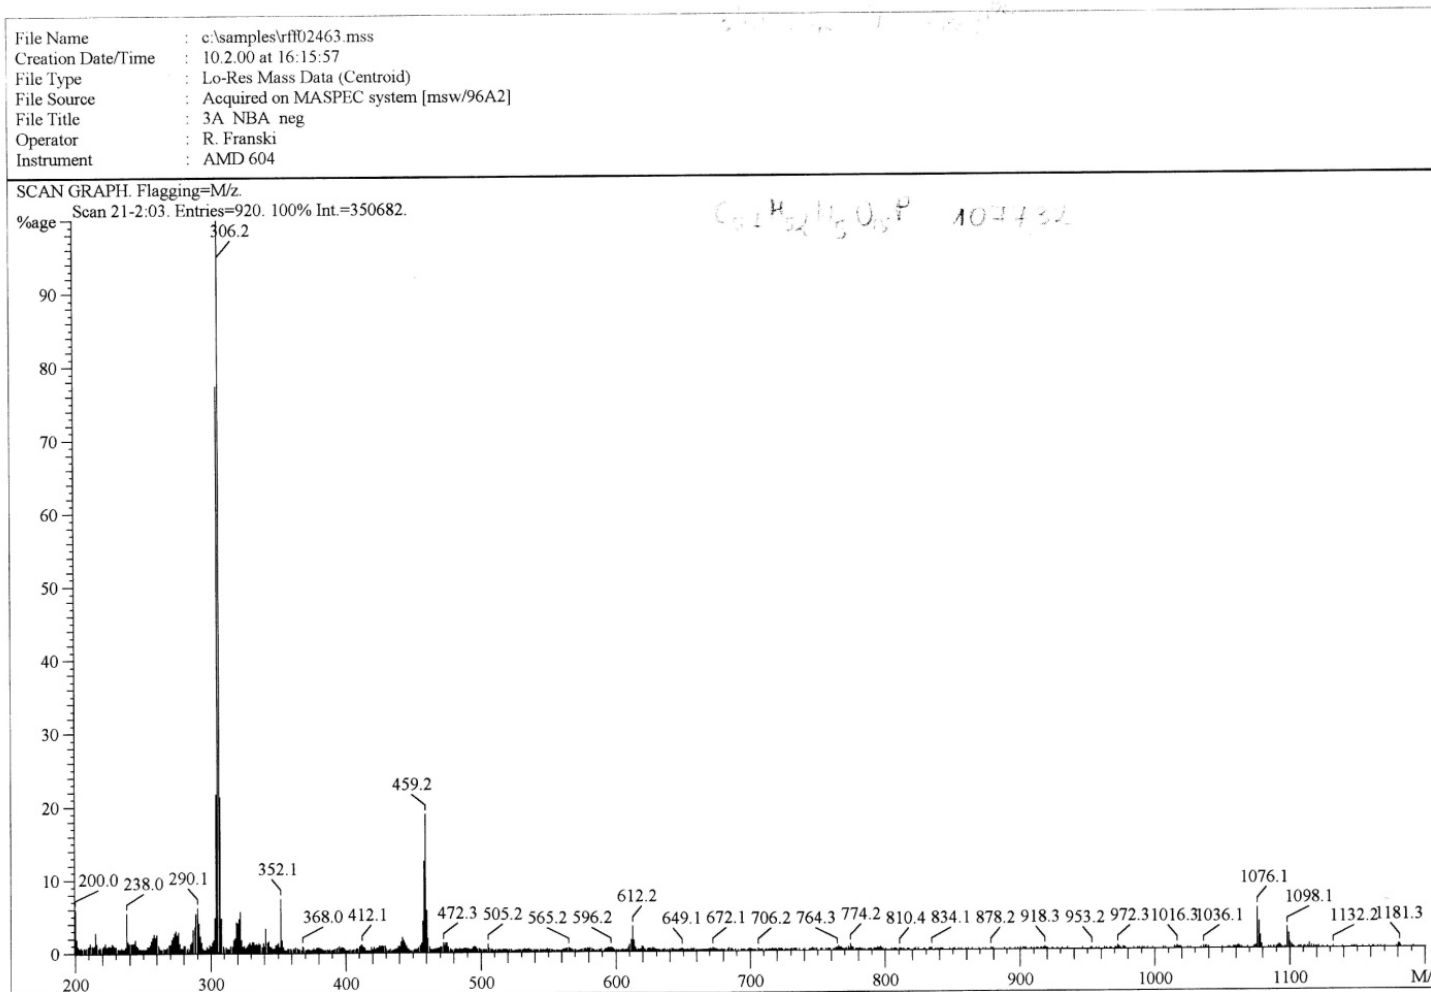

Figure S26.  $^{31}\text{P}$ -NMR of Compound 9c.

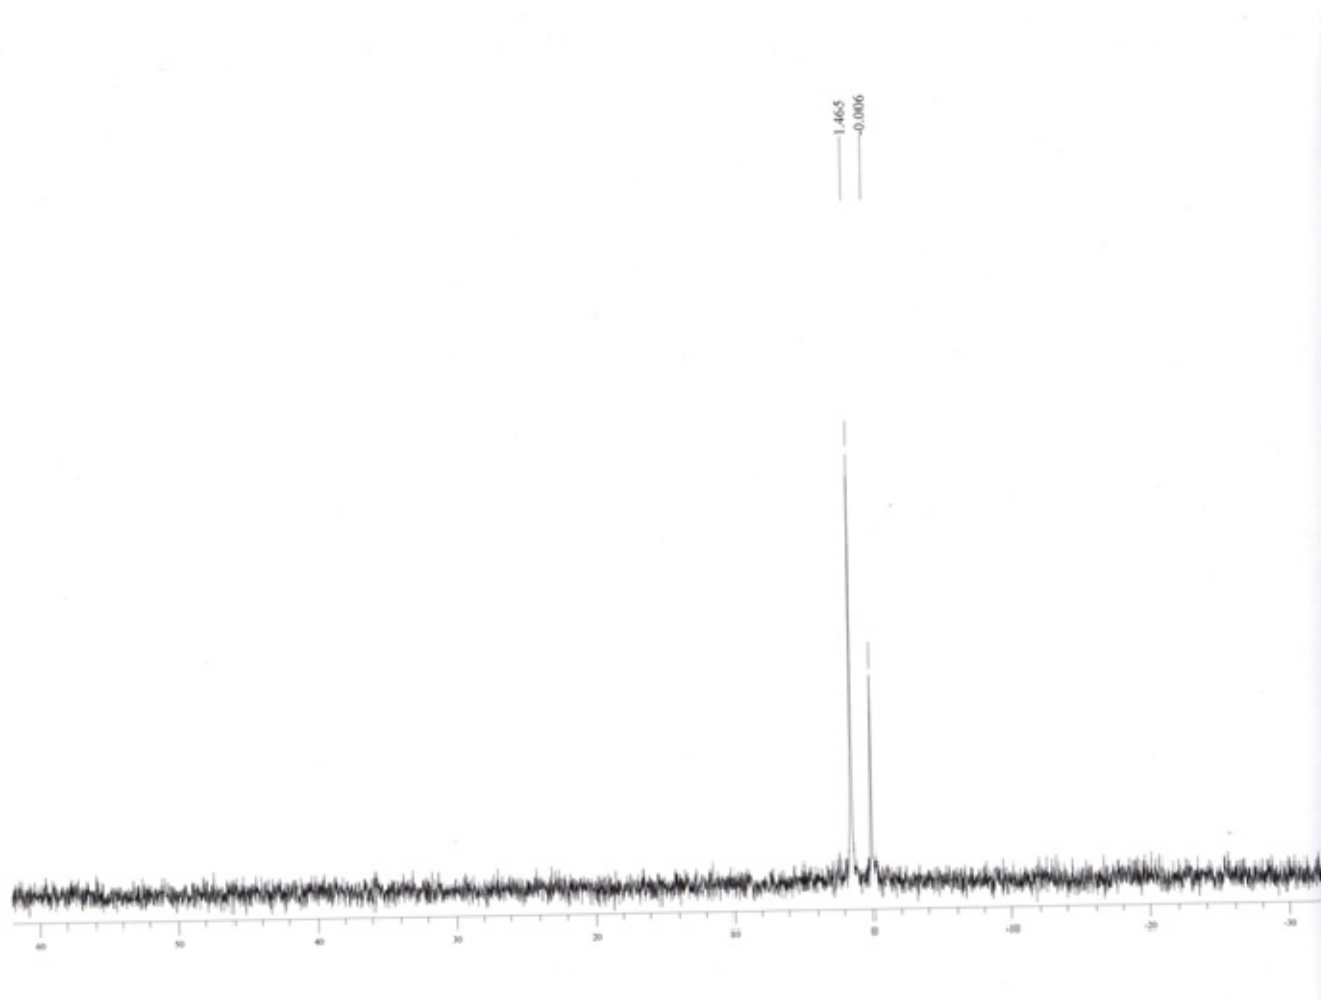

Figure S27.  $^{31}\text{P}$ -NMR of Compound 9c.

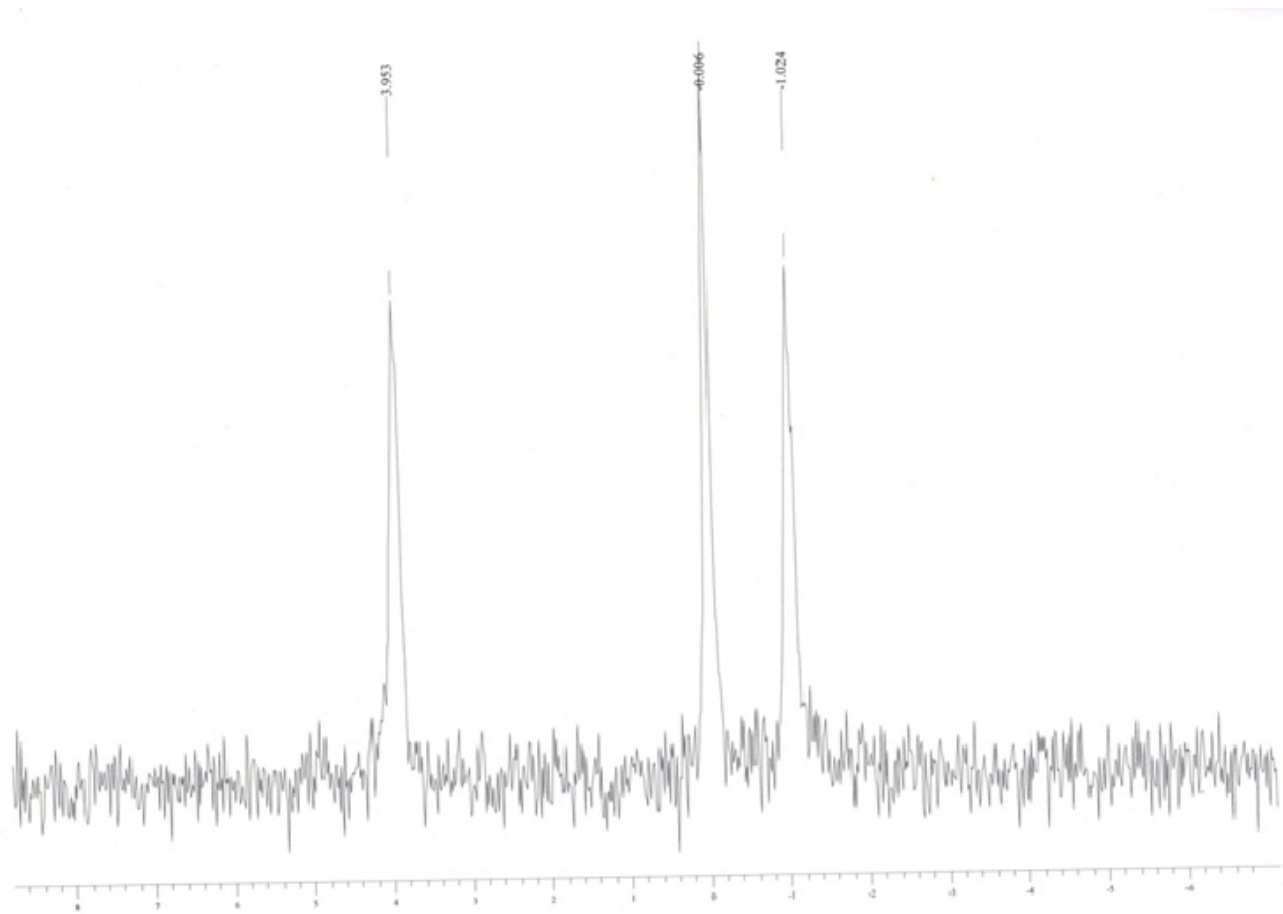

Figure S28.  $^{31}\text{P}$ -NMR Compound 12a.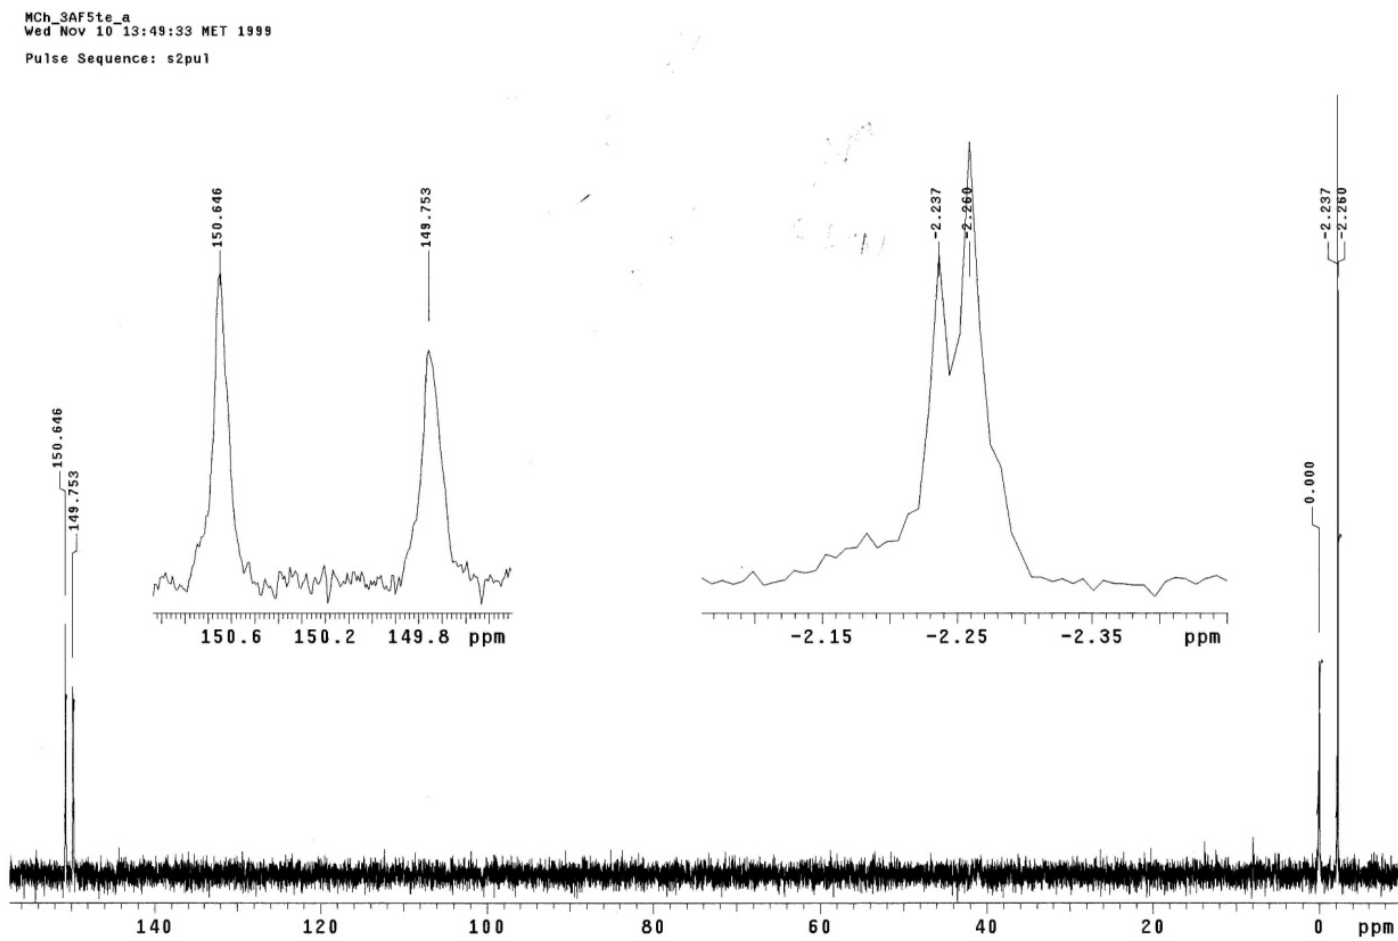

Figure S29. MS Analysis of Compound 12a.

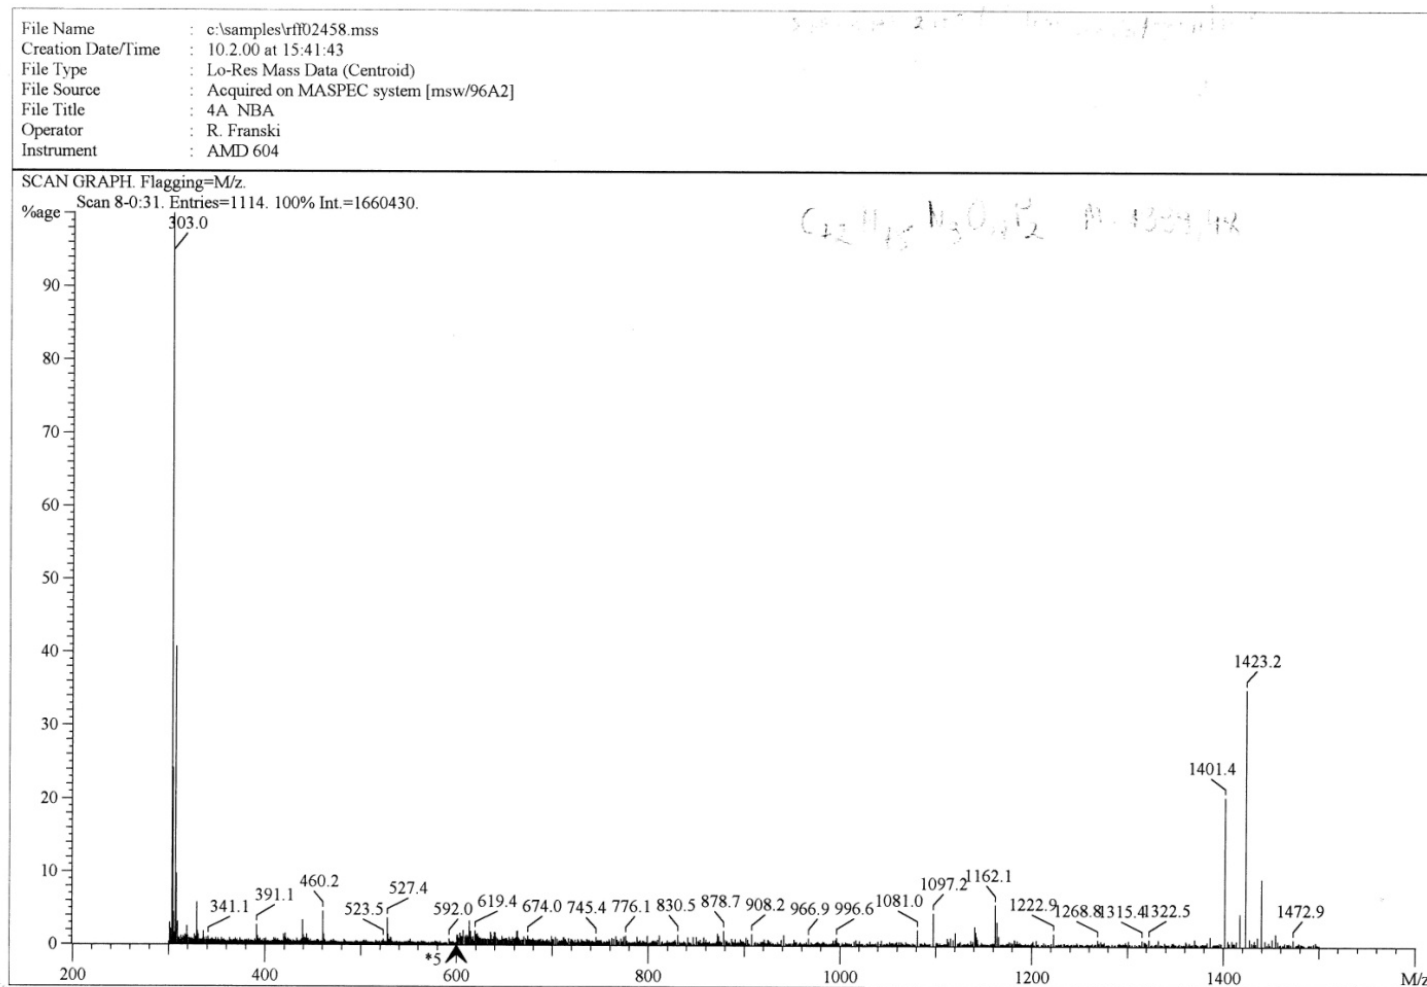

Figure S30.  $^{31}\text{P}$ -NMR of Compound 12c.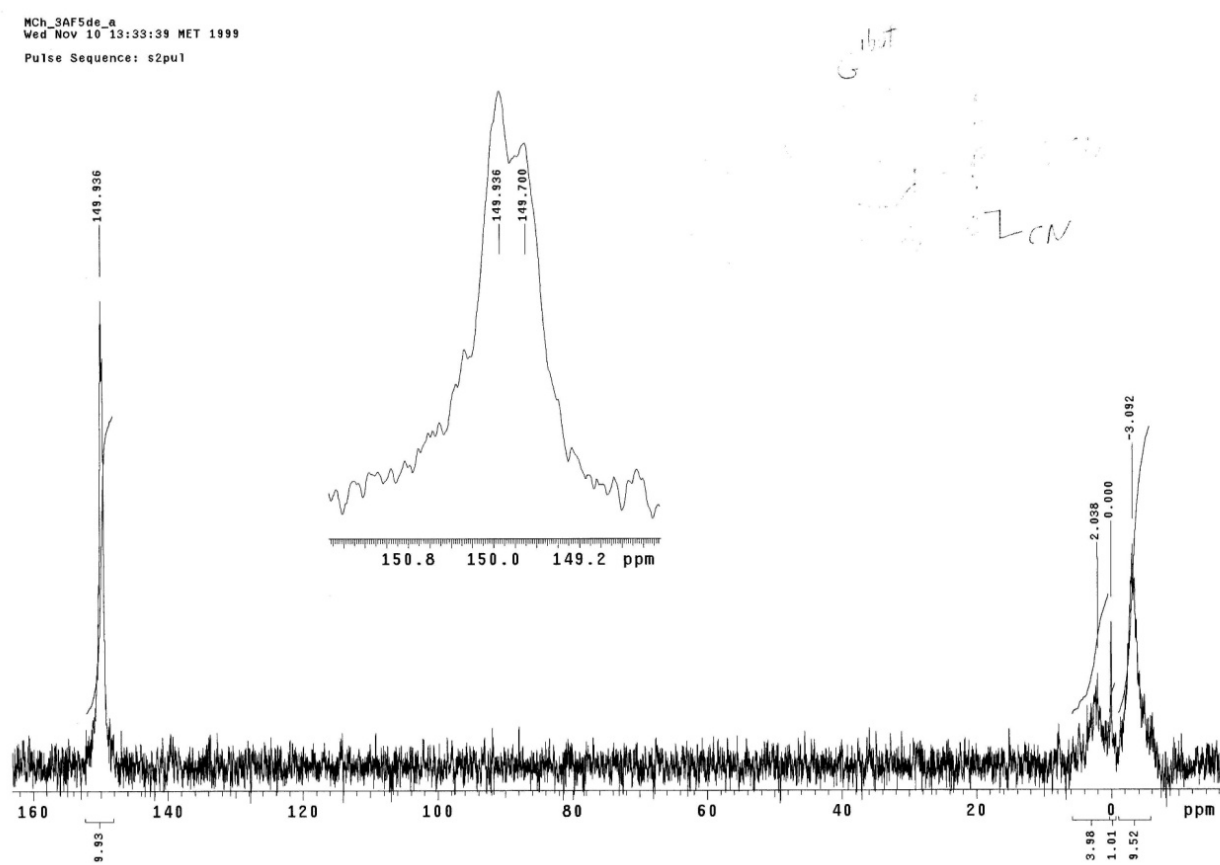

Figure S31. MS Analysis of D1.

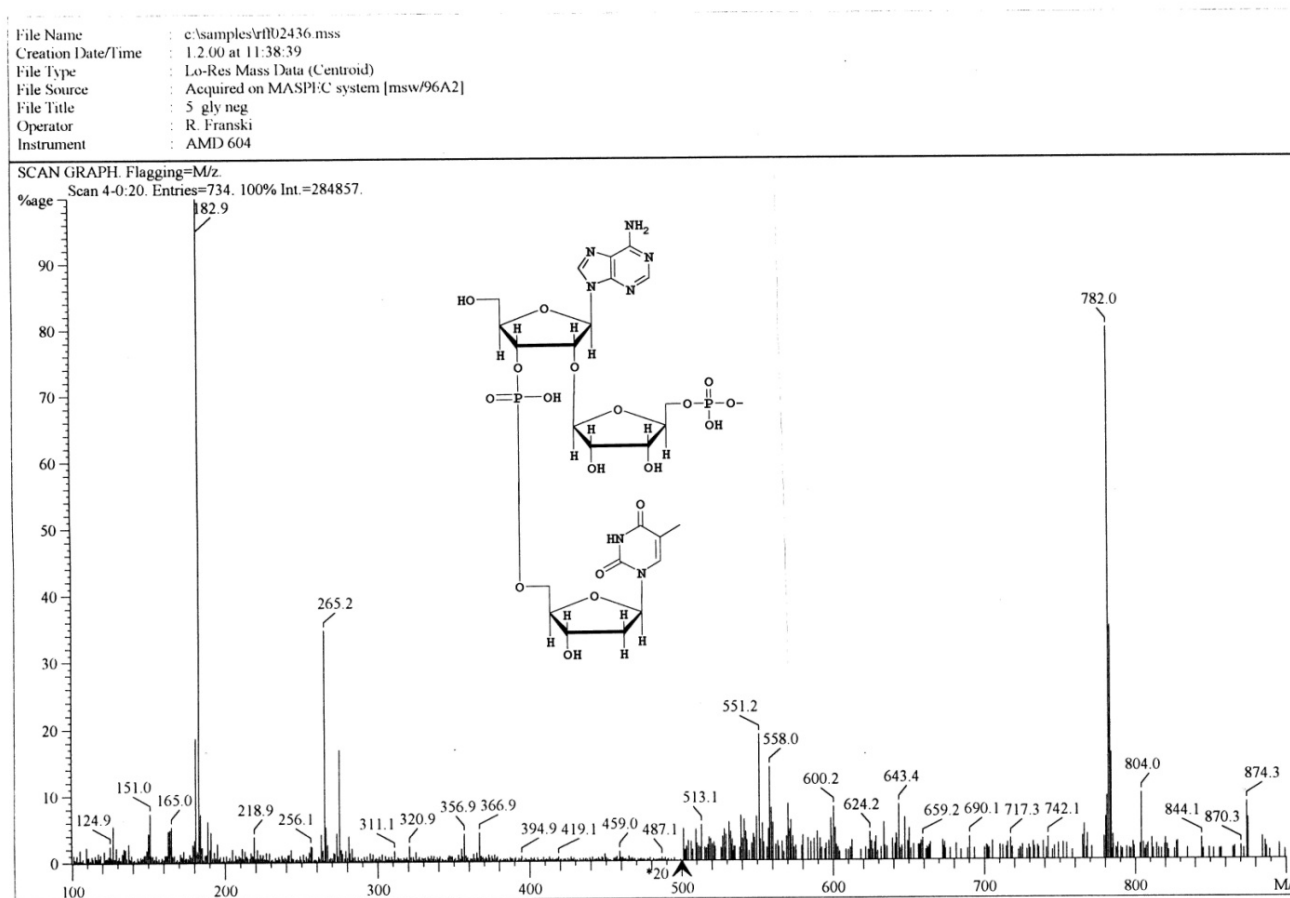

Figure S32. MS Analysis of D2.

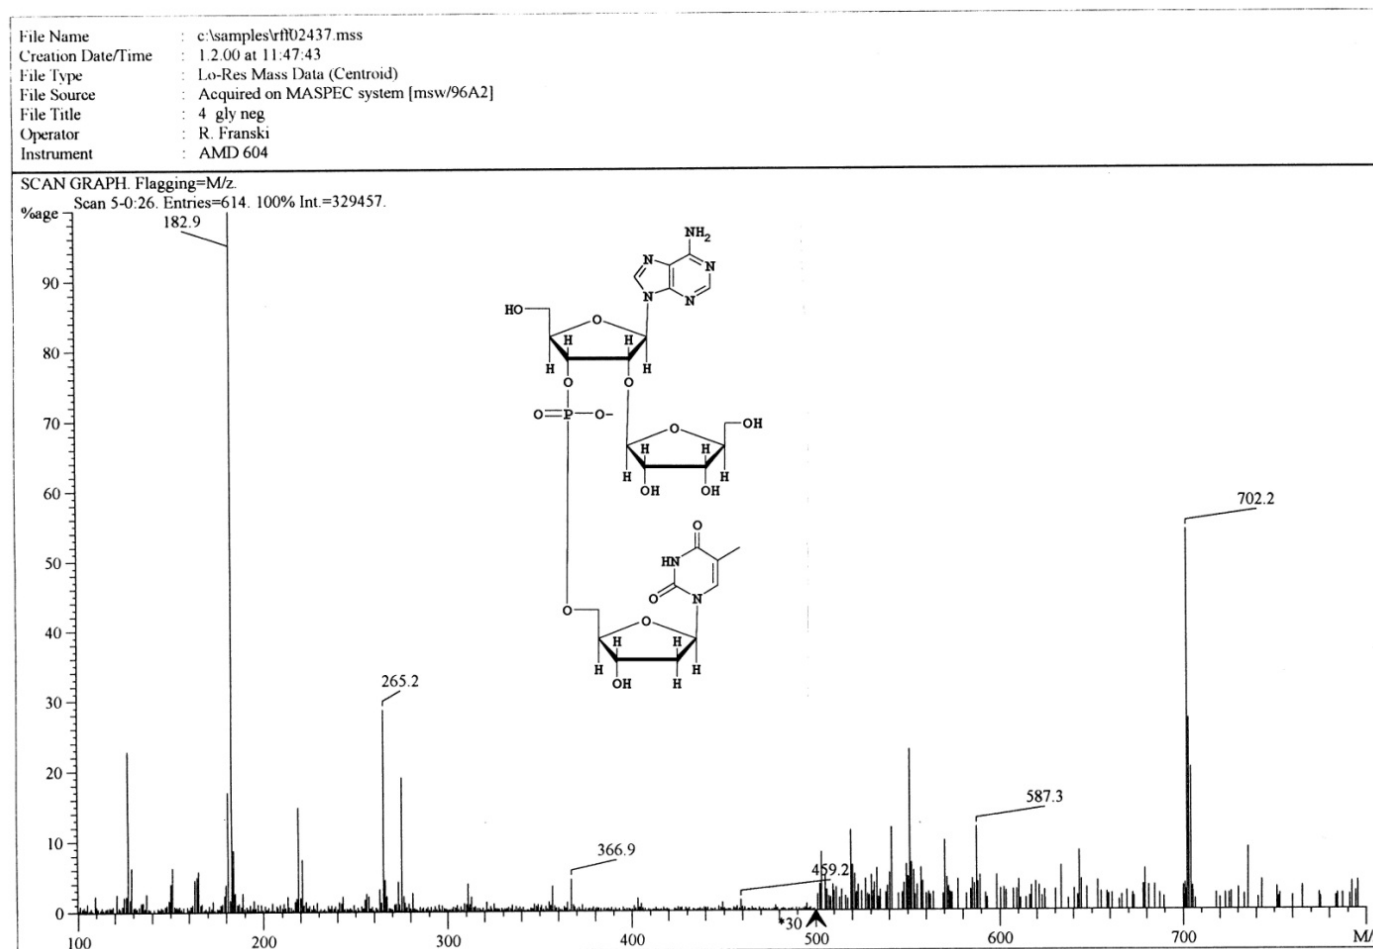



Figure S33. Determine the purity of dimer D1 and D2 by HPLC analysis

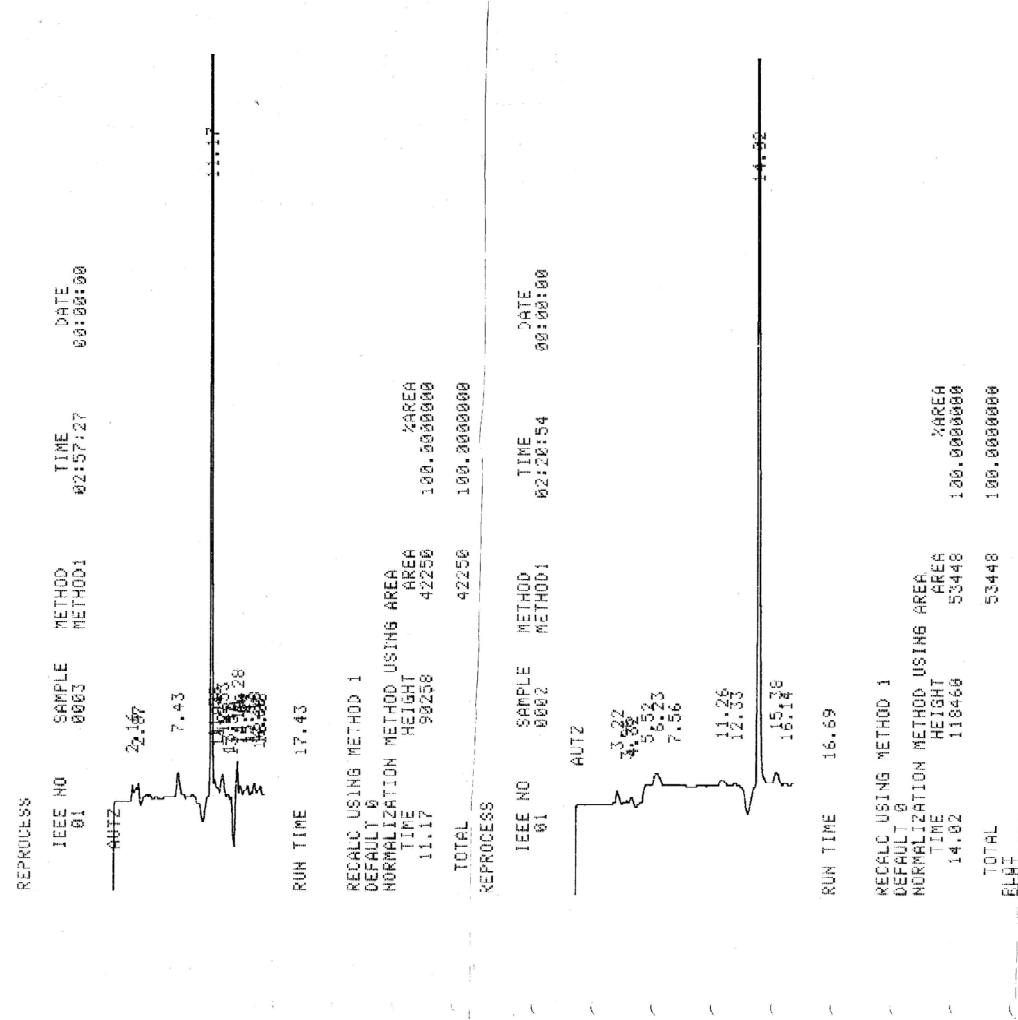

Supplement: s1 [file s1]
